# Supplementary material
Source: publisher site journal article supplement (https://www.dovepress.com/article/461843)
Supplement: Supplementary file 1 [file get_supplementary_file.php]

# Supporting Information

## 1. Supplementary Figures

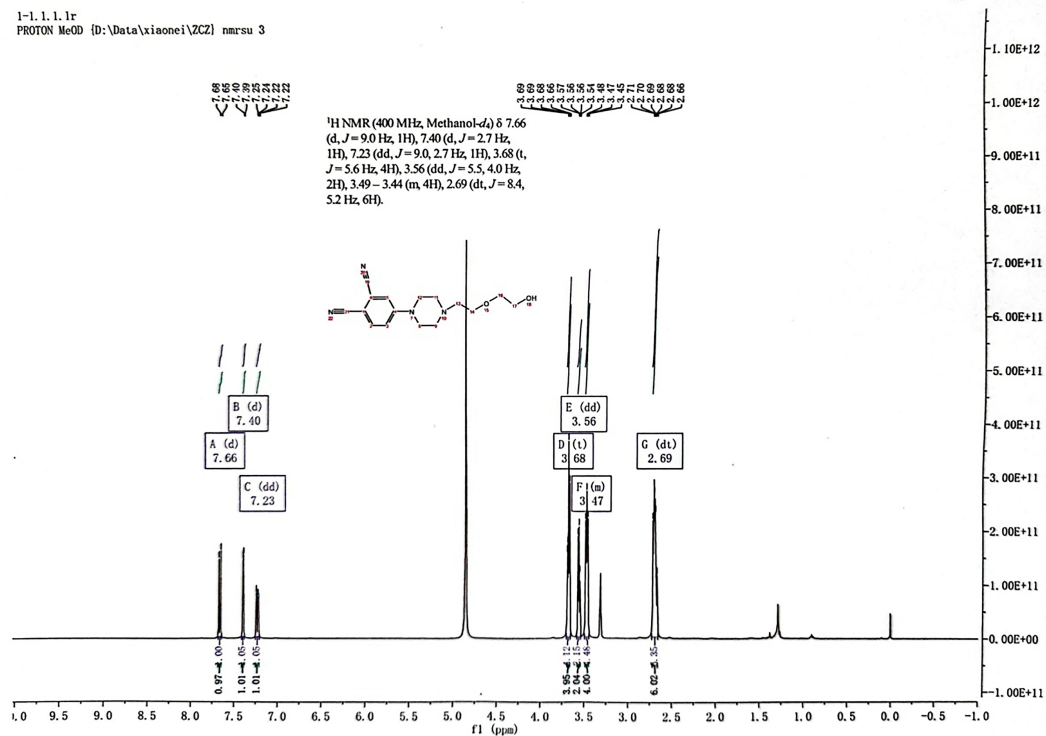

Figure S1. <sup>1</sup>H-NMR spectrum of intermediate 2 in MeOH.

1-1 #11 RT: 0.10 AV: 1 NL: 7.75E9

T: FTMS + p ESI Full lock ms [100.0000-1000.0000]

301.16599

C<sub>16</sub>H<sub>21</sub>O<sub>2</sub>N<sub>4</sub> = 301.16590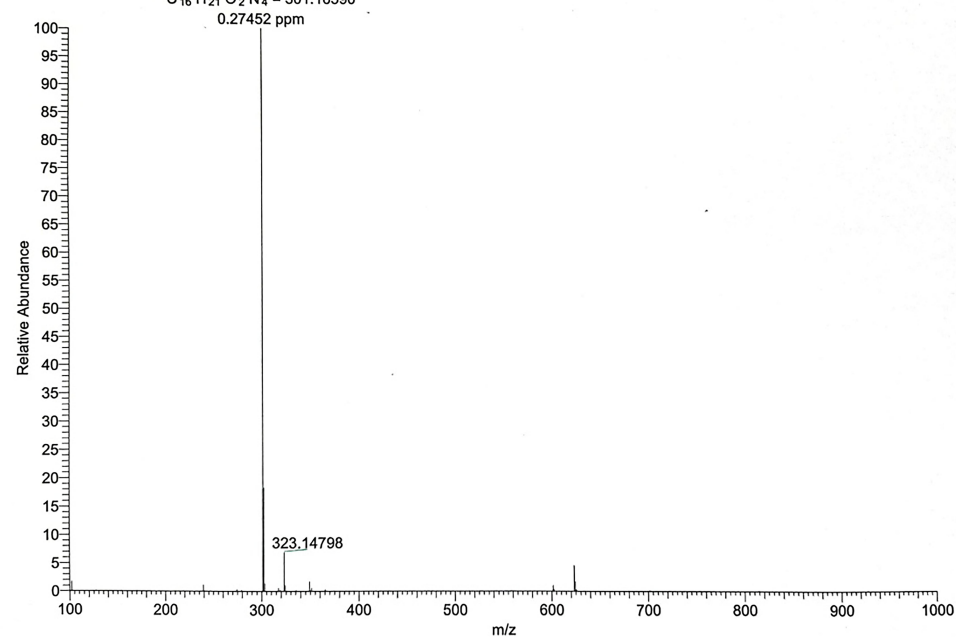

6

7

**Figure S2.** HRMS of intermediate 2.

8

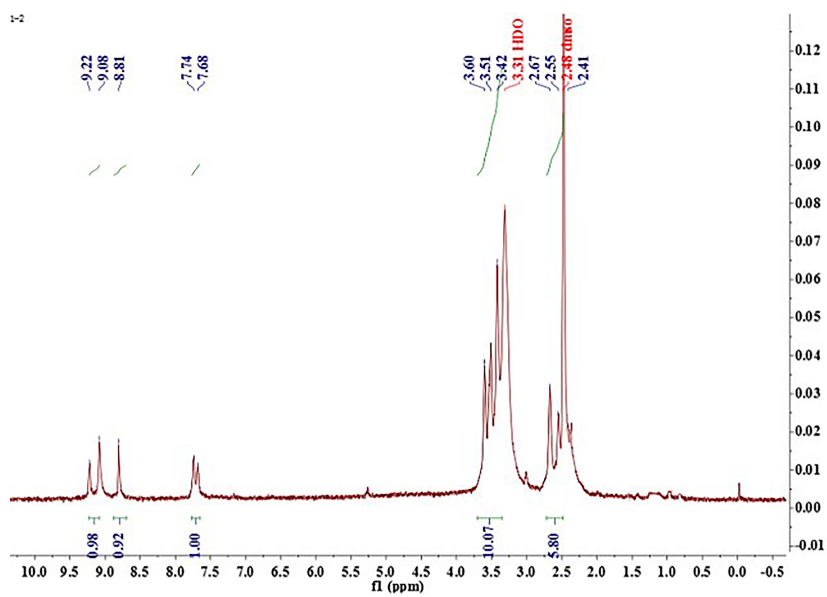

9

10

**Figure S3.** <sup>1</sup>H-NMR spectrum of ZnPc 1 in DMSO.

11

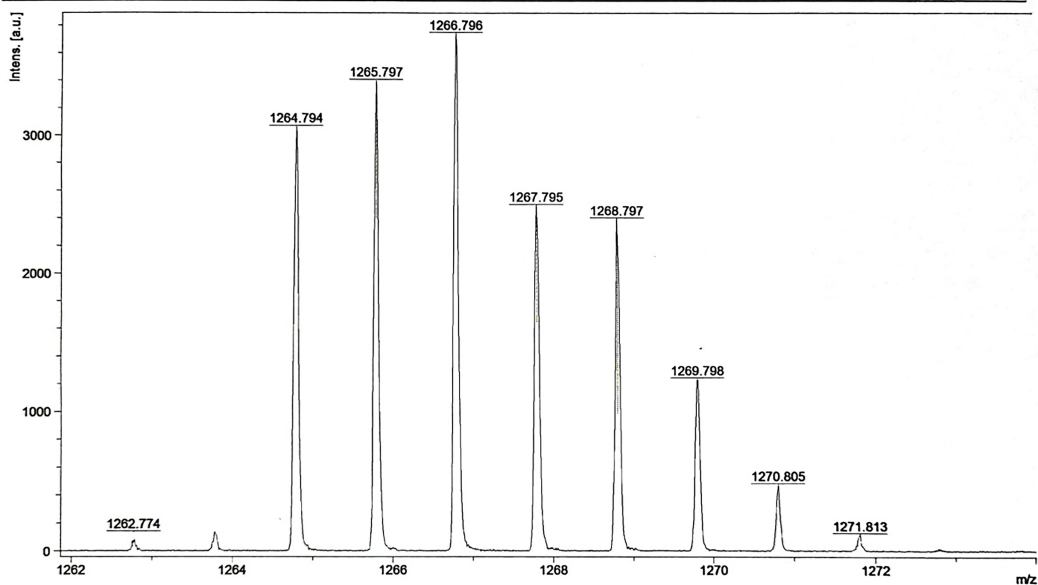

12  
13  
14

**Figure S4.** MALDI-TOF-MS of ZnPc 1.

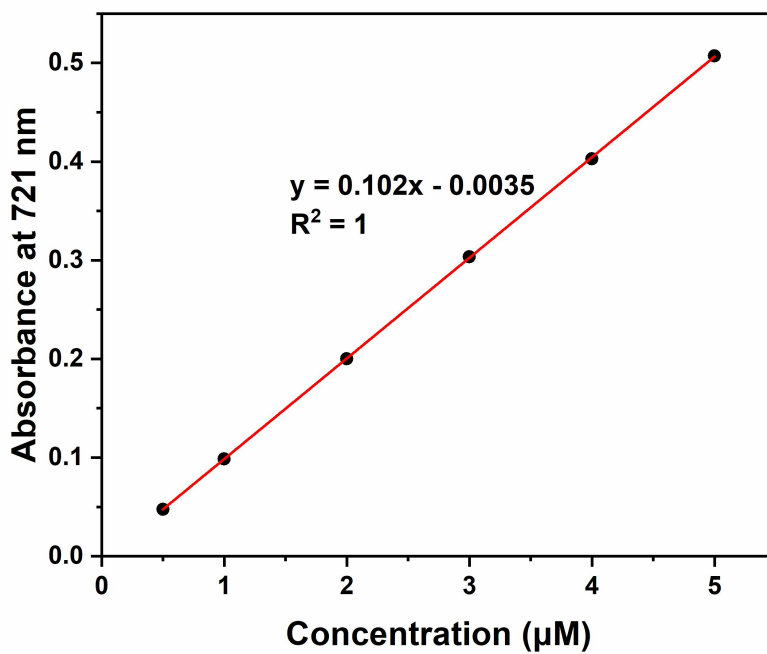

15  
16  
17  
18

**Figure S5.** The liner plot of the absorbance of ZnPc 1 in DMSO in the Q-band ( $\lambda_{max}$ ) as a function of concentration.

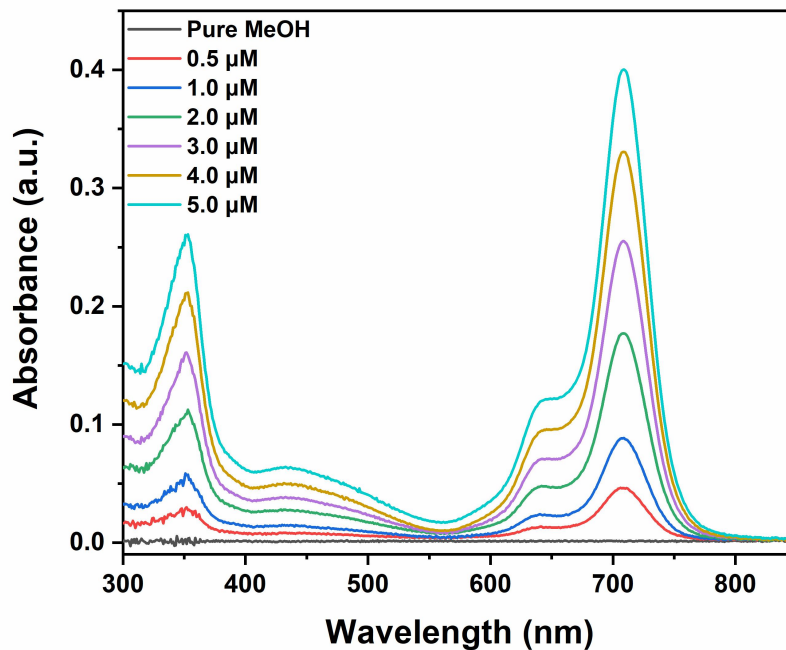

19

**Figure S6.** UV-Vis absorption spectra of ZnPc 1 in MeOH.

20

21

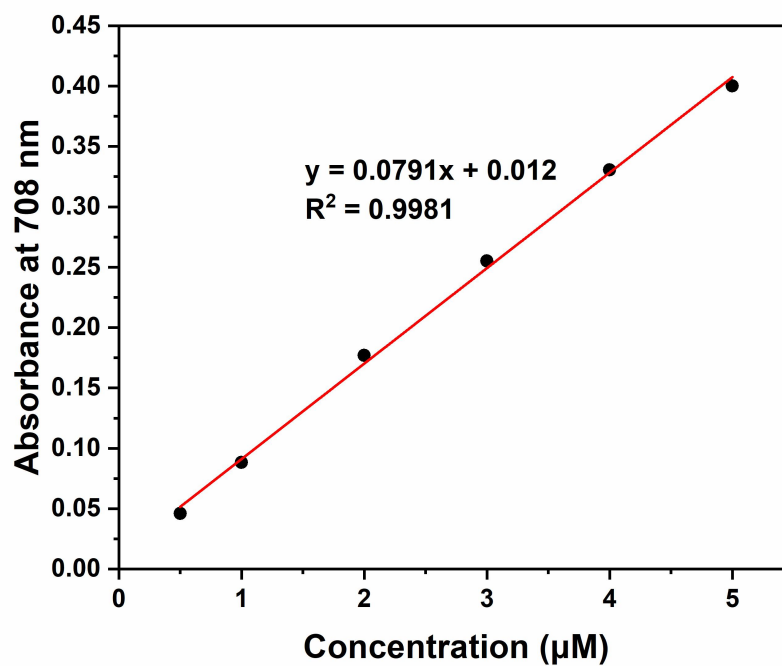

22

**Figure S7.** The liner plot of the absorbance of ZnPc 1 in MeOH in the Q-band ( $\lambda_{\max}$ ) as a function of concentration.

24

25

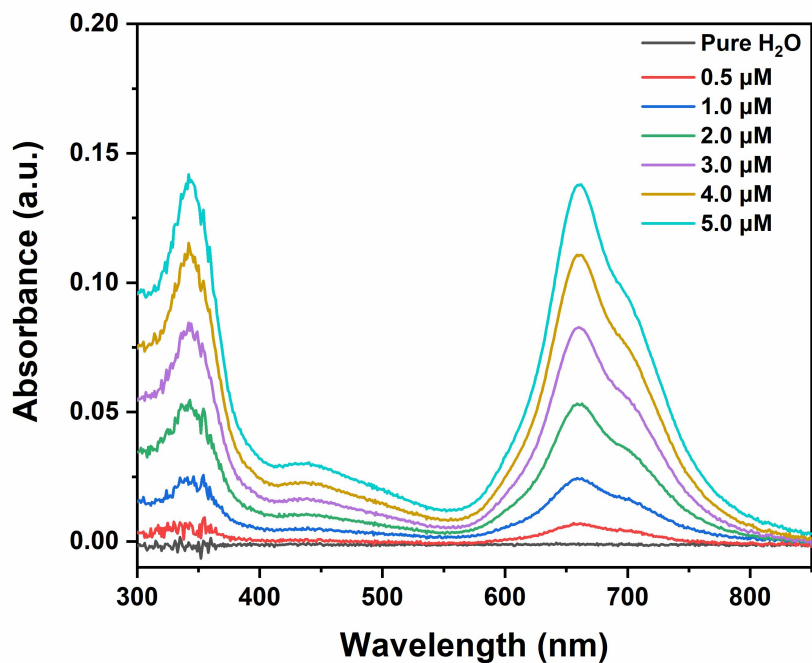

26

27 **Figure S8.** UV-Vis absorption spectra of ZnPc 1 in water.

28

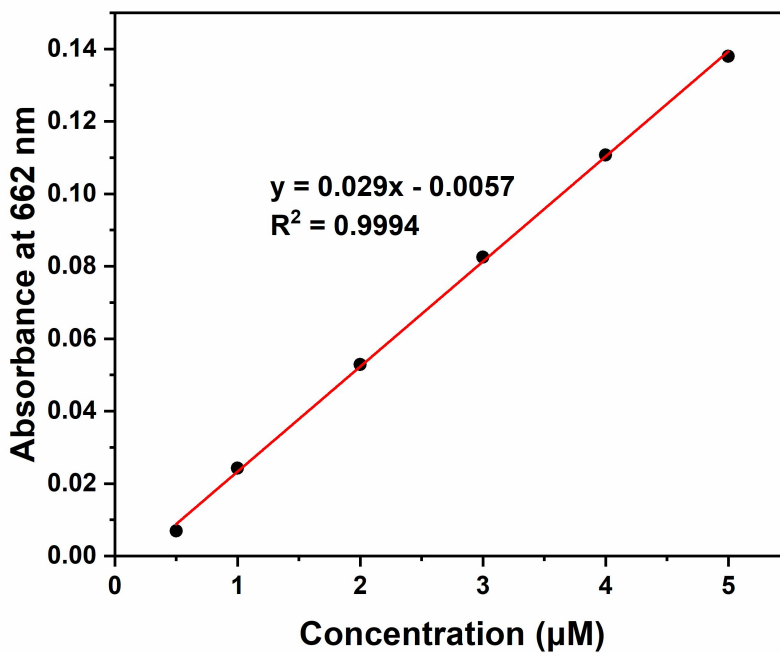

29

30 **Figure S9.** The liner plot of the absorbance of ZnPc 1 in water in the Q-band ( $\lambda_{\max}$ ) as a function of  
31 concentration.

32

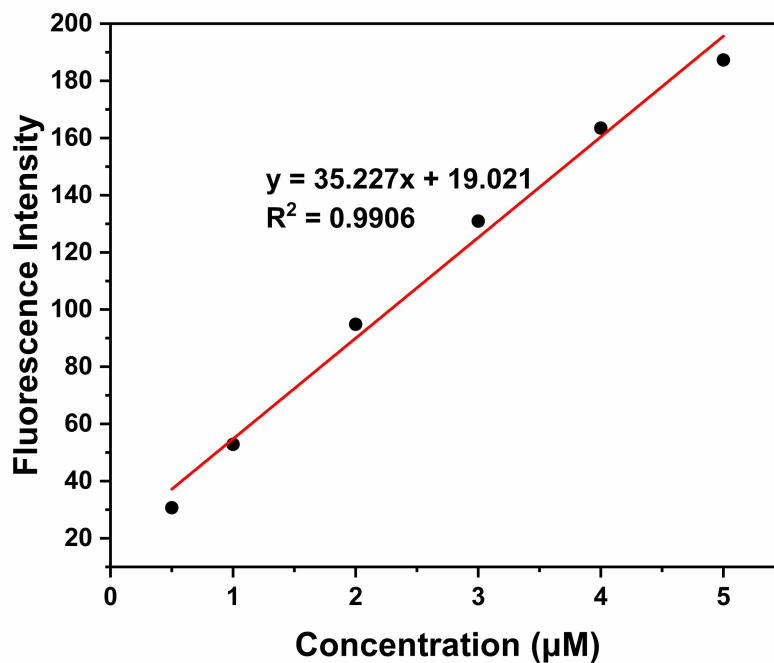

33

34 **Figure S10.** The line graph of the FL intensity of ZnPc 1 with  $\lambda_{\text{Ex}} = 649$  nm as a function of  
 35 concentration in DMSO.

36

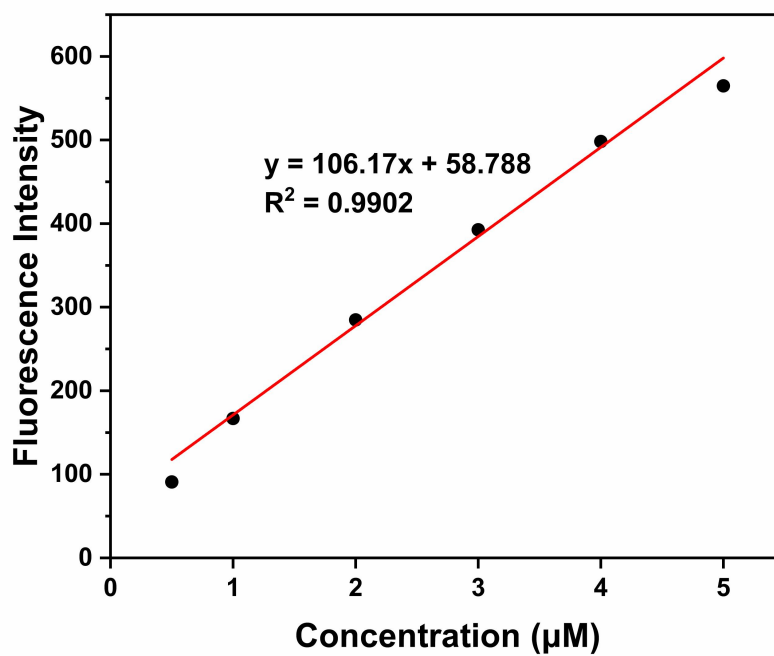

37

38 **Figure S11.** The line graph of the FL intensity of ZnPc 1 with  $\lambda_{\text{Ex}} = 700$  nm as a function of  
 39 concentration in DMSO.

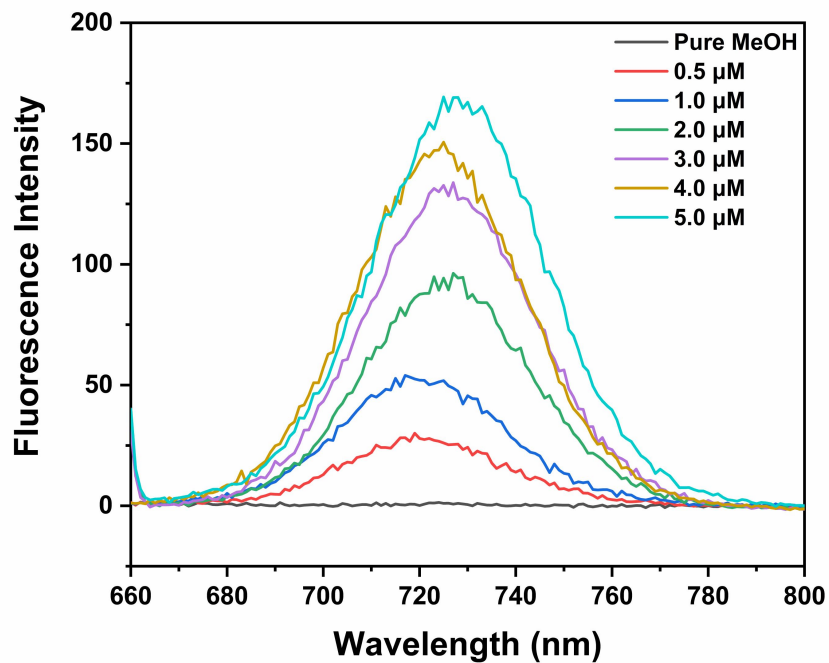

41

42

**Figure S12.** FL emission spectra of ZnPc 1 in MeOH with  $\lambda_{\text{Ex}} = 649$  nm.

43

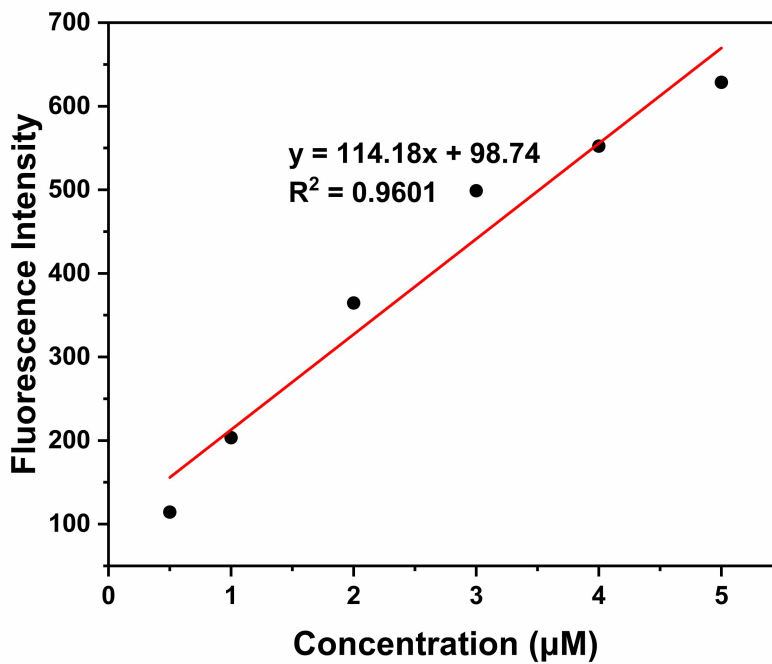

44

45

**Figure S13.** The line graph of the FL intensity of ZnPc 1 with  $\lambda_{\text{Ex}} = 649$  nm as a function of concentration in MeOH.

46

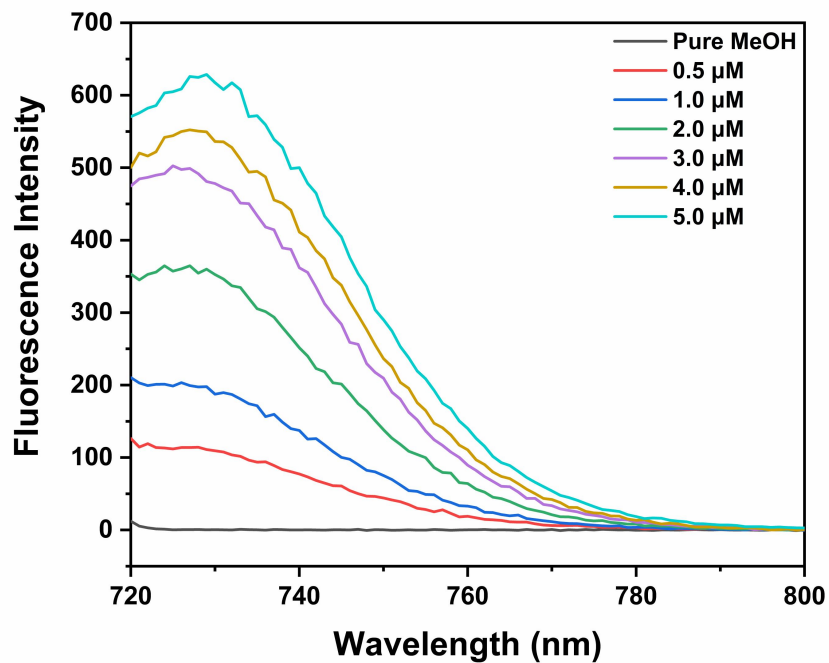

48

49

**Figure S14.** FL emission spectra of ZnPc 1 in MeOH with  $\lambda_{\text{Ex}} = 700$  nm.

50

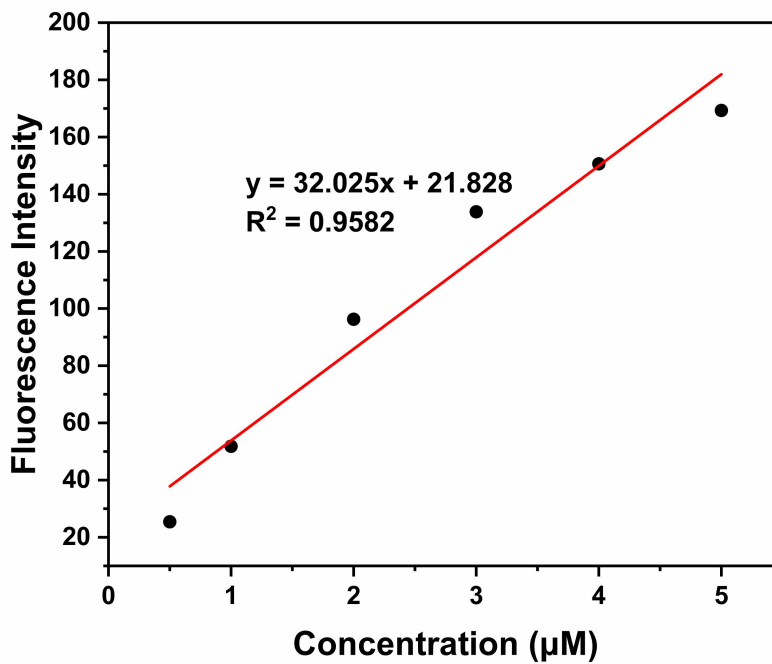

51

52

**Figure S15.** The line graph of the FL intensity of ZnPc 1 with  $\lambda_{\text{Ex}} = 700$  nm as a function of concentration in MeOH.

53



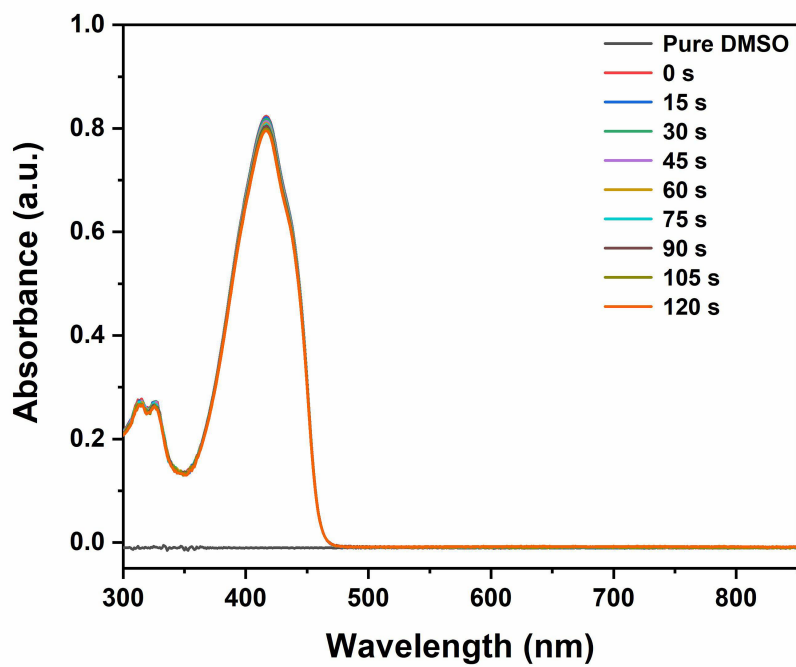

55

56 **Figure S16.** The UV-Vis spectra of DPBF in DMSO for different irradiation times under 690 nm  
57 laser irradiation (0.2 W/cm<sup>2</sup>).

58

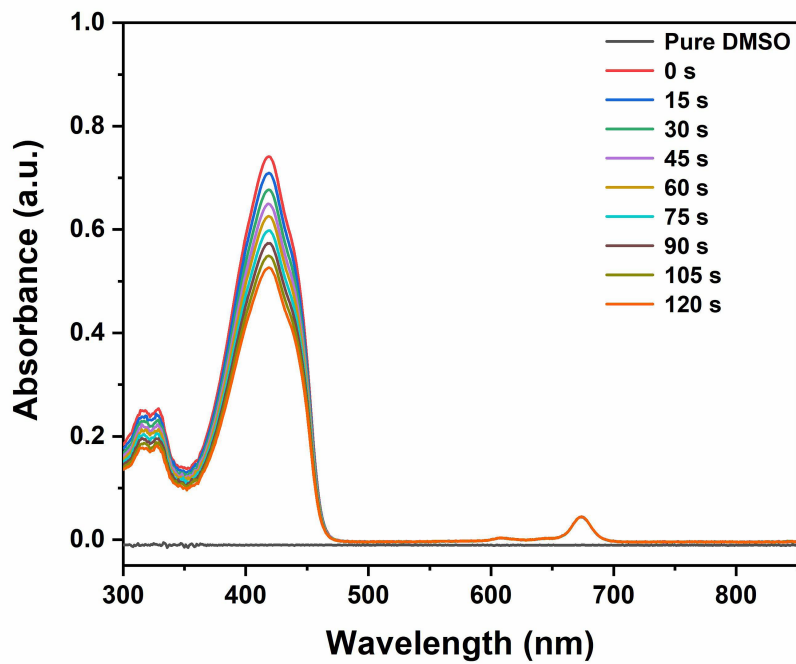

59

60 **Figure S17.** The UV–Vis spectra of DPBF containing ZnPc in DMSO for different irradiation  
 61 times under the 690 nm laser irradiation (0.2 W/cm<sup>2</sup>).  
 62

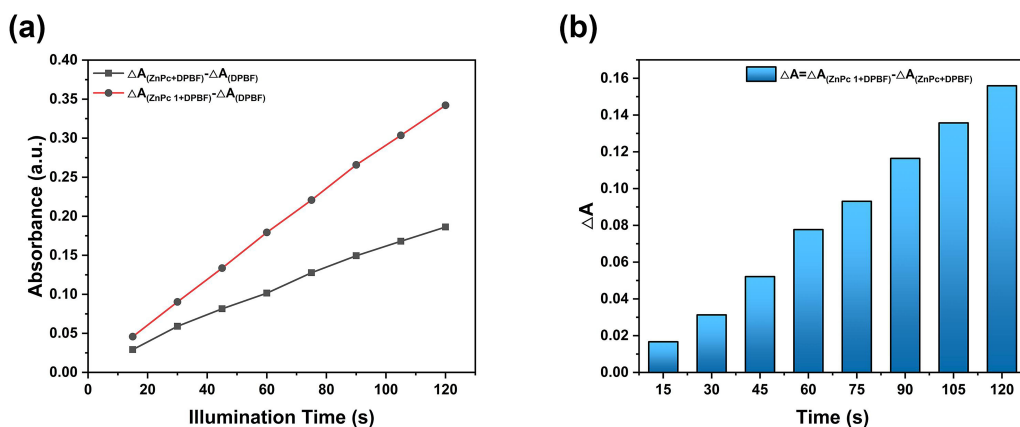

63 **Figure S18.** (a) The corresponding relative absorbance variations of different groups ( $\Delta$   
 64  $A_{(\text{ZnPc}+\text{DPBF})}-\Delta A_{(\text{DPBF})}$  and  $\Delta A_{(\text{ZnPc 1}+\text{DPBF})}-\Delta A_{(\text{DPBF})}$ ) at different irradiation times under the 690  
 65 nm laser irradiation (0.2 W/cm<sup>2</sup>). (b) The corresponding relative Increased absorbance variations of  
 66 ZnPc 1 at different irradiation times under the 690 nm laser irradiation (0.2 W/cm<sup>2</sup>).  
 67  
 68

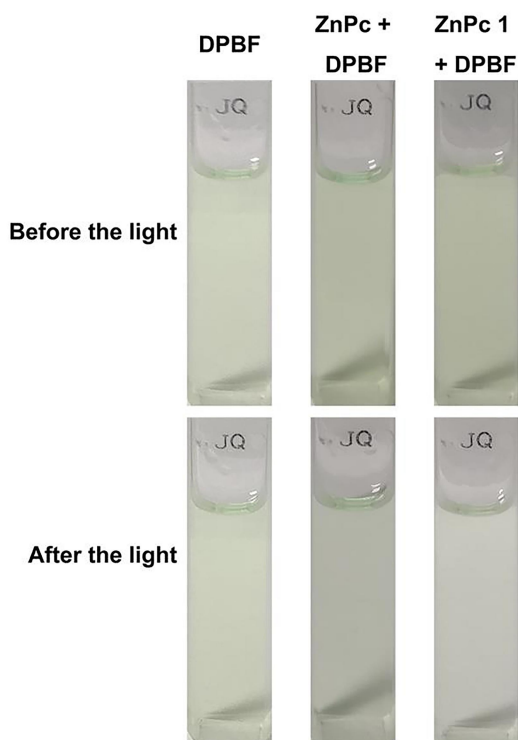

69 **Figure S19.** Comparison of DPBF degradation before and after 690 nm laser irradiation (0.2  
 70 W/cm<sup>2</sup>, 2 min).  
 71  
 72

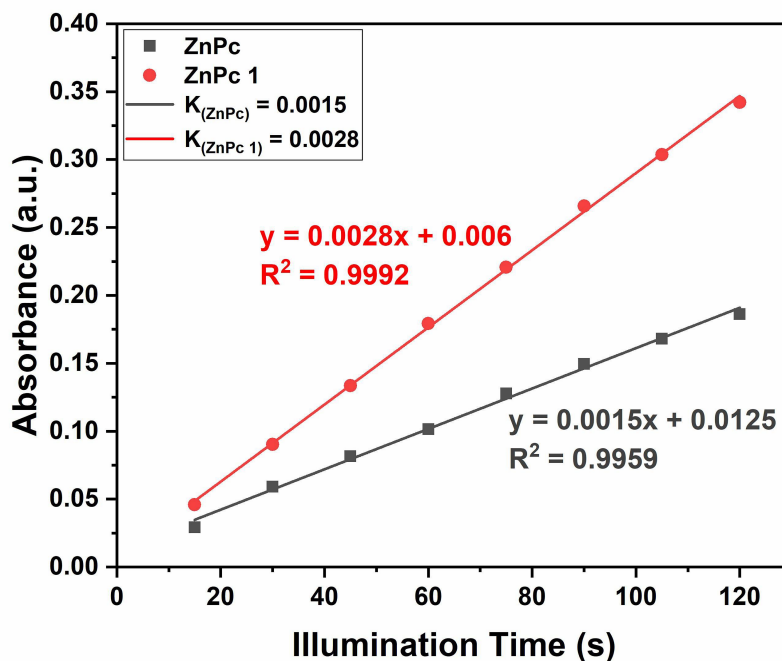

73

74 **Figure S20.** The linear diagram of difference in absorbance of ZnPc or ZnPc 1 at 415 nm as a  
 75 function of illumination time.

76

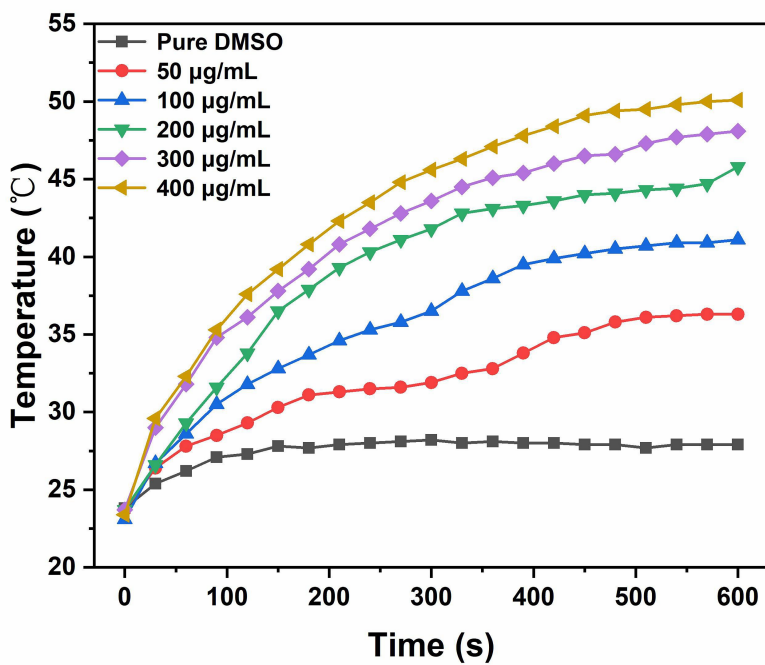

77

78 **Figure S21.** Temperature elevation of ZnPc 1 in DMSO in dependence of concentration (808 nm,  
 79 1.75 W/cm<sup>2</sup>).

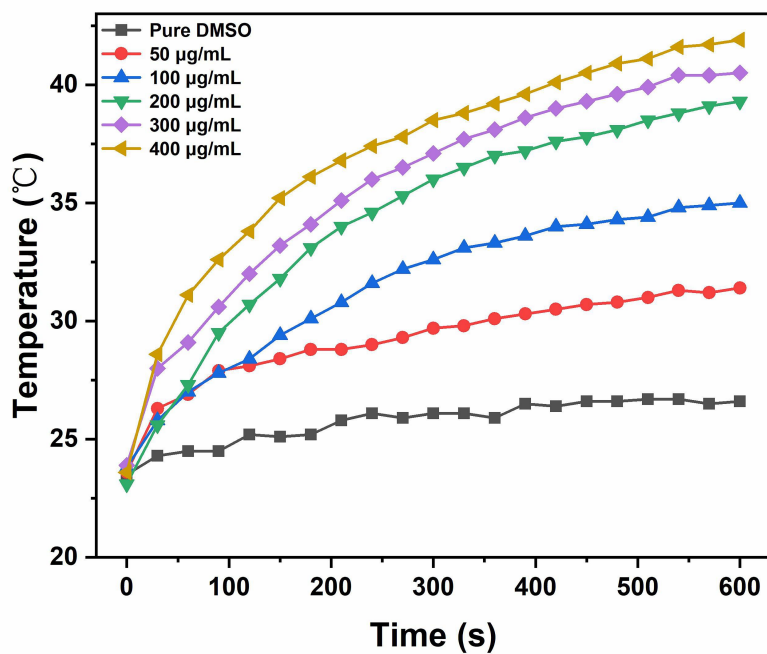

81

**Figure S22.** Temperature elevation of ZnPc 1 in DMSO in dependence of concentration (808 nm, 1.0 W/cm<sup>2</sup>).

83

84

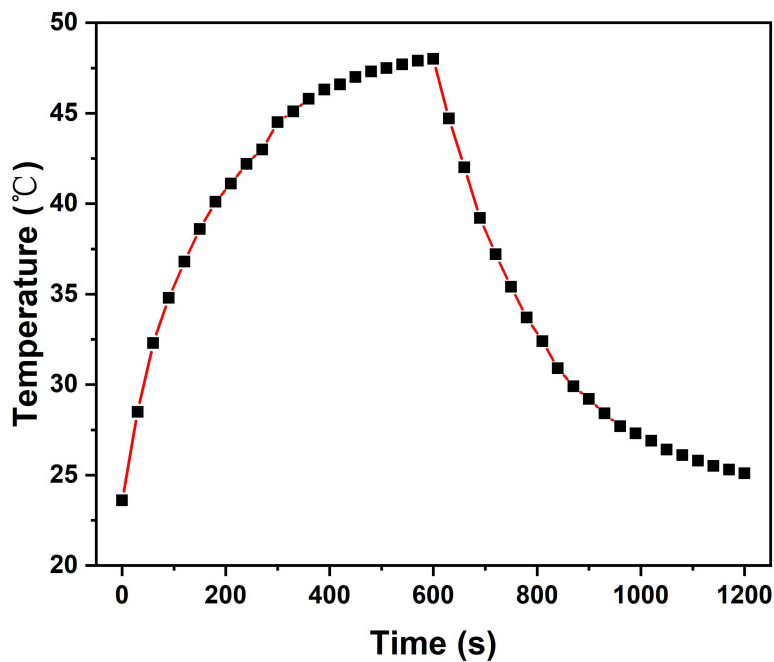

85

86

**Figure S23.** Photothermal effect of ZnPc 1 in DMSO irradiated with 808 nm laser (1.75 W/cm<sup>2</sup>).

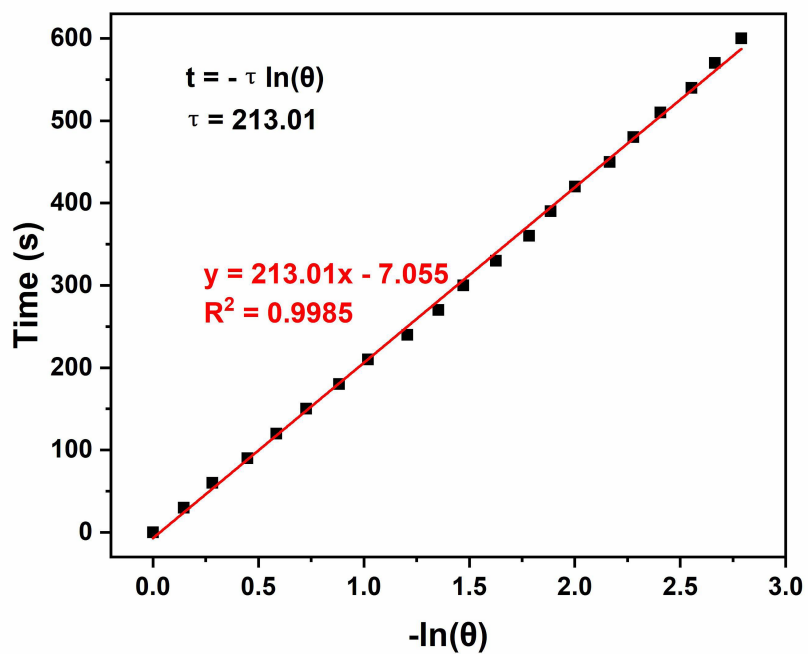

88

89

**Figure S24.** Cooling time versus negative natural logarithm of the temperature obtained from the cooling period.

90

91

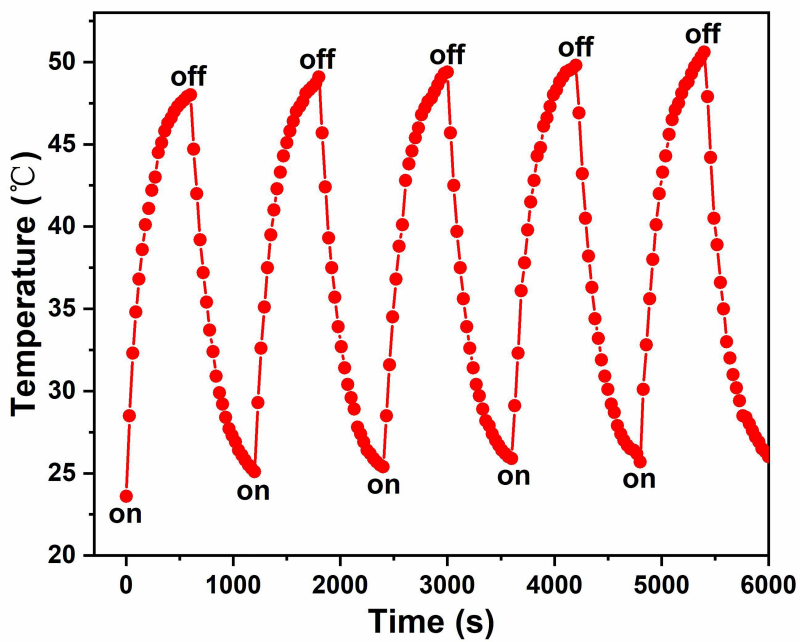

92

93

**Figure S25.** Temperature change of ZnPc 1 for five irradiation/cooling cycles (1.75 W/cm<sup>2</sup>).

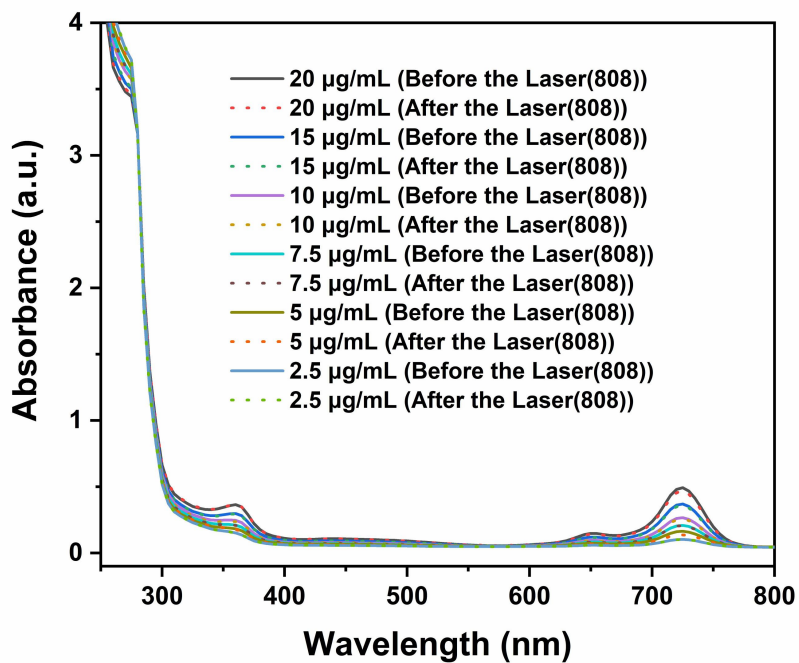

95

96 **Figure S26.** UV-Vis absorption spectra of ZnPc 1 with different diluting factor before and after five  
97 irradiation/cooling cycles (808 nm, 1.0 W/cm<sup>2</sup>, 10 min).

98

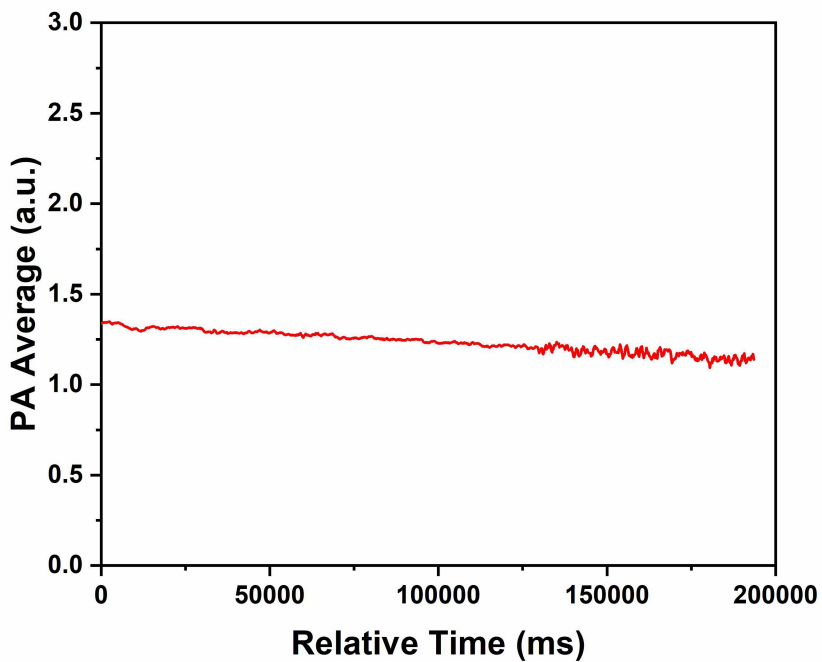

99

100 **Figure S27.** PA stability of ZnPc 1.

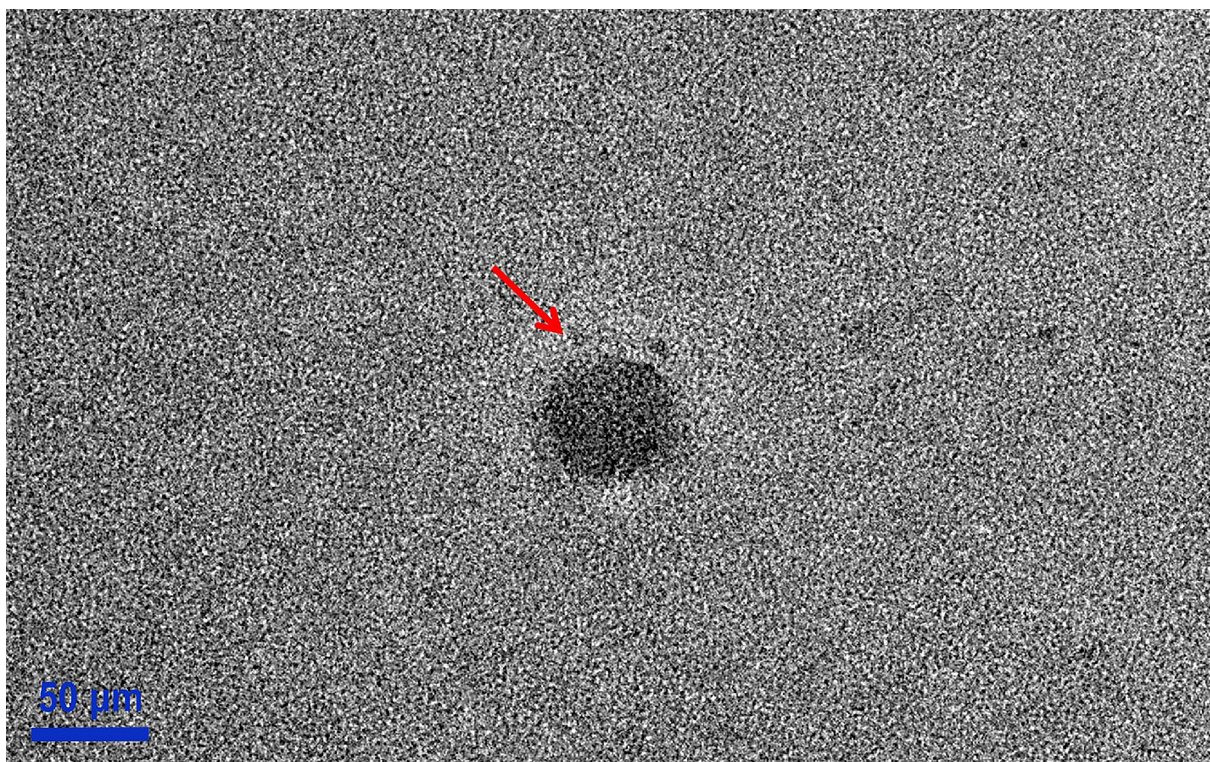

102

103 **Figure S28.** TEM images of ZnPc 1 NPs (The red arrow indicates that ZnPc 1 NPs are spherical  
104 nanoparticles).

105

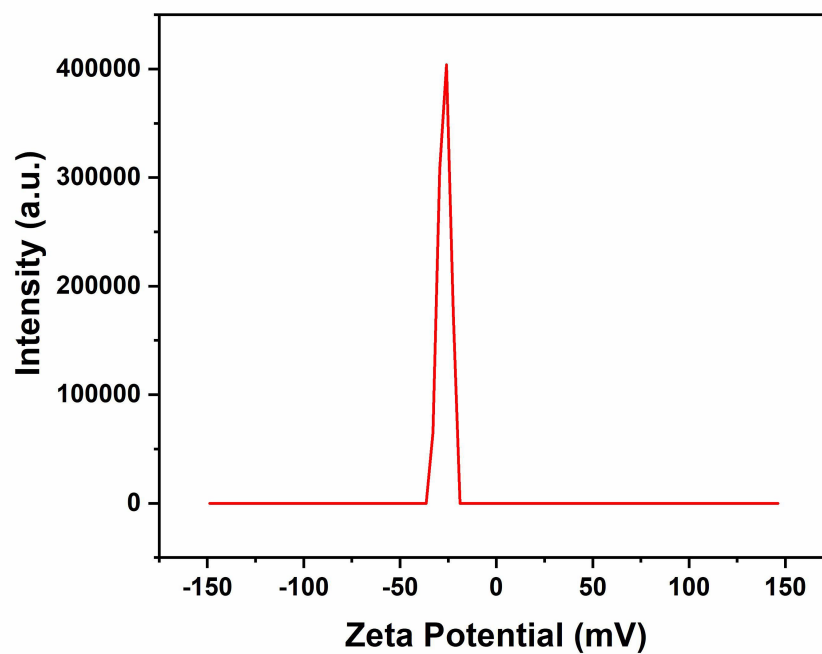

106

107 **Figure S29.** Zeta potentials of ZnPc 1 NPs.

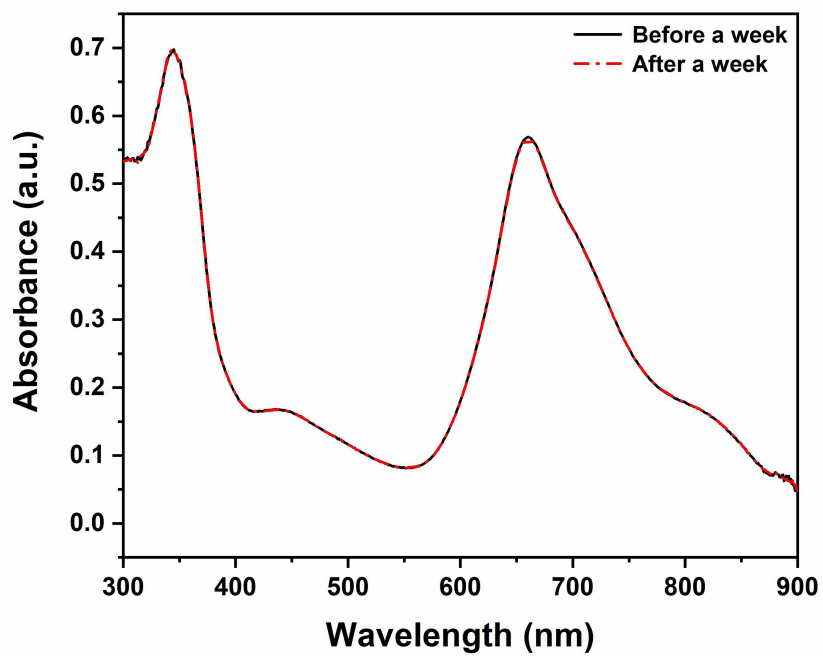

109

110

**Figure S30.** Stability of NPs within a week storage under 4°C.

111

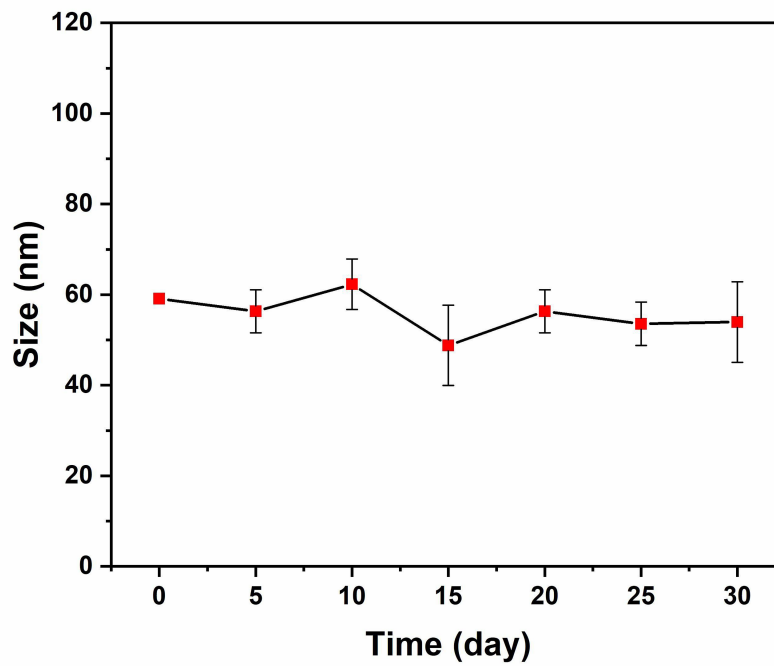

112

113

**Figure S31.** Stability of NPs within a month storage under 4°C.

114



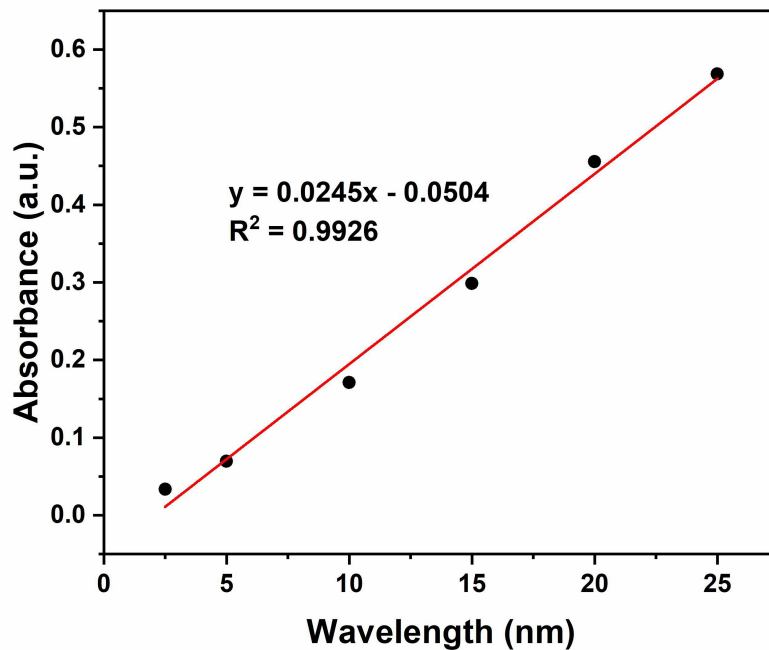

115

116 **Figure S32.** The liner plot of the absorbance of ZnPc 1 NPs in the Q-band ( $\lambda$  max) as a function of  
 117 concentration.

118

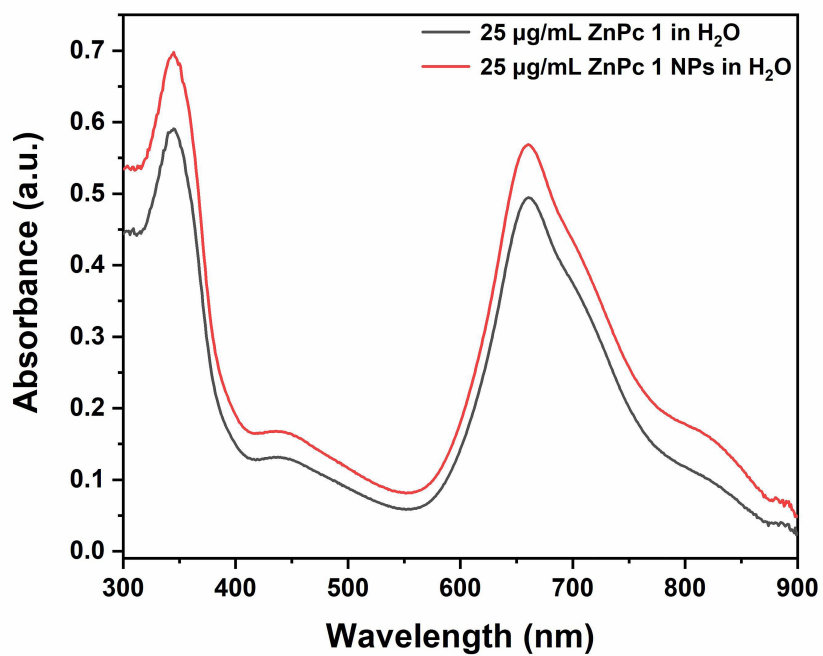

119

120 **Figure S33.** Comparison of UV-Vis absorption spectra of ZnPc1 and ZnPc 1 NPs with the same  
 121 concentration in water.

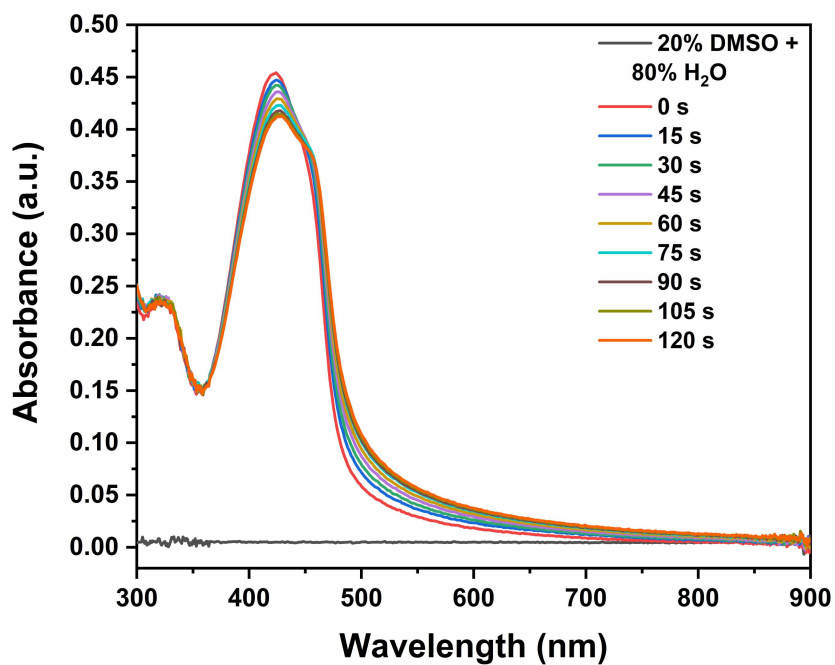

123

124 **Figure S34.** The UV-Vis spectra of DPBF in water containing 20% DMSO for different  
125 irradiation times under 690 nm laser irradiation ( $0.2 \text{ W/cm}^2$ ).

126

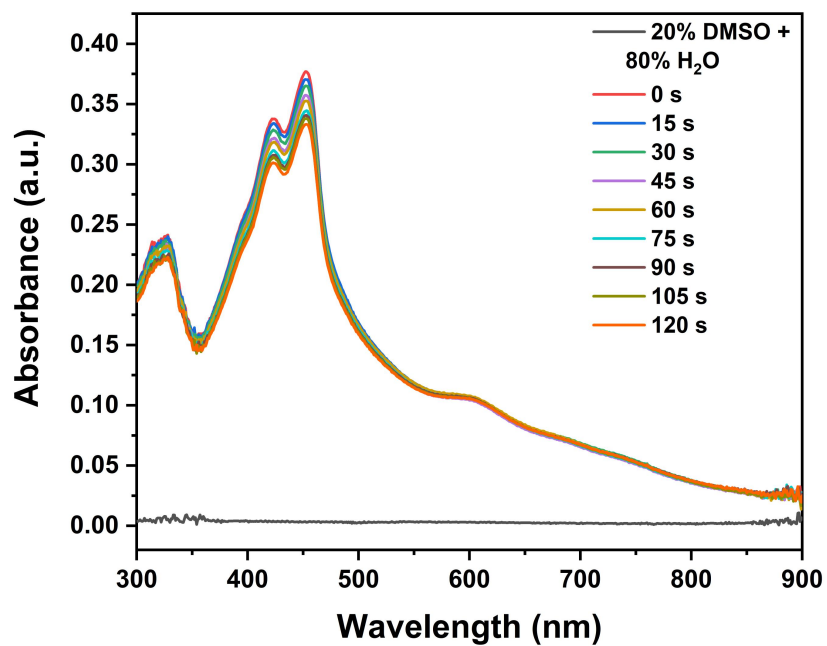

127

128 **Figure S35.** The UV-Vis spectra of DPBF containing ZnPc in water containing 20% DMSO for  
129 different irradiation times under 690 nm laser irradiation ( $0.2 \text{ W/cm}^2$ ).

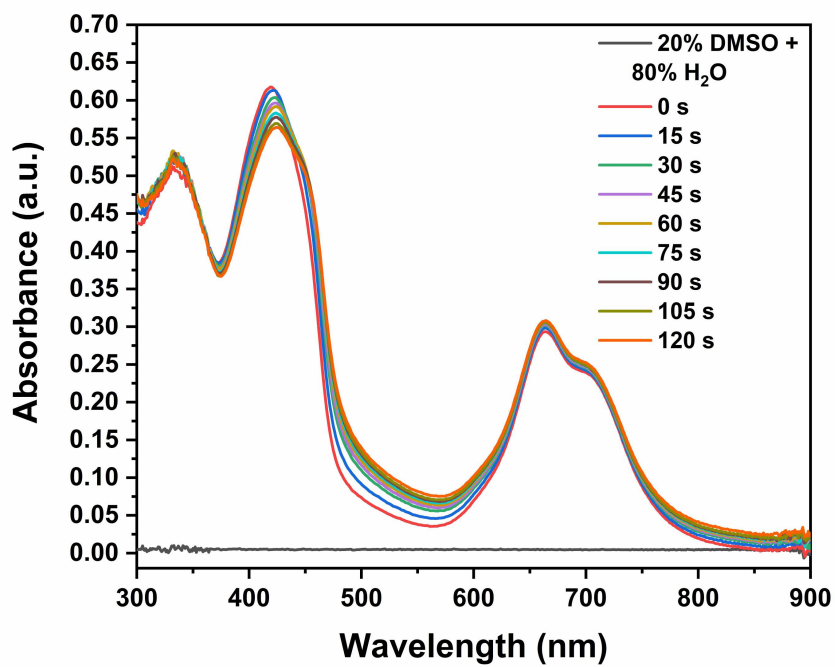

131

132 **Figure S36.** The UV-Vis spectra of DPBF containing ZnPc 1 in water containing 20% DMSO for  
133 different irradiation times under 690 nm laser irradiation ( $0.2 \text{ W/cm}^2$ ).

134

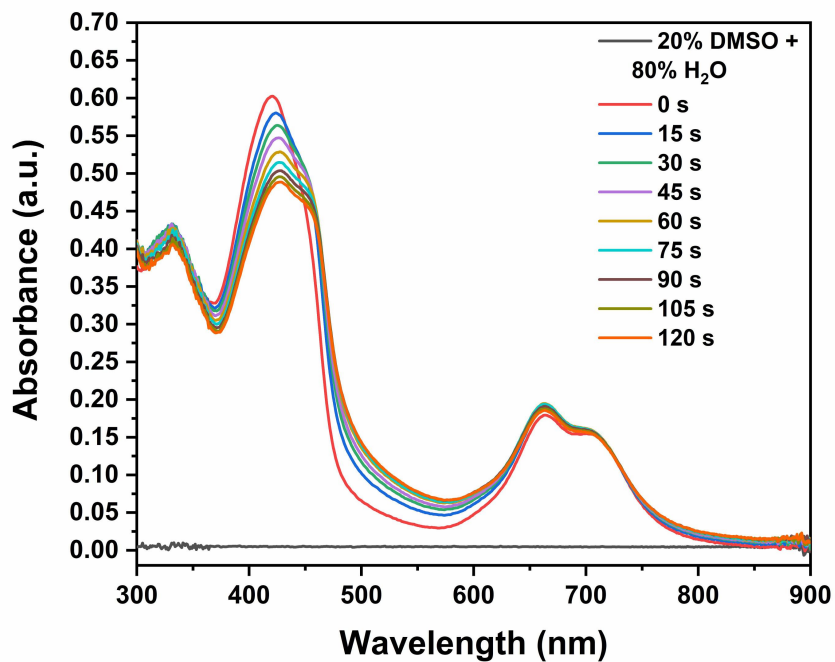

135

136  
137  
138

**Figure S37.** The UV–Vis spectra of DPBF containing ZnPc 1 NPs in water containing 20% DMSO for different irradiation times under 690 nm laser irradiation (0.2 W/cm<sup>2</sup>).

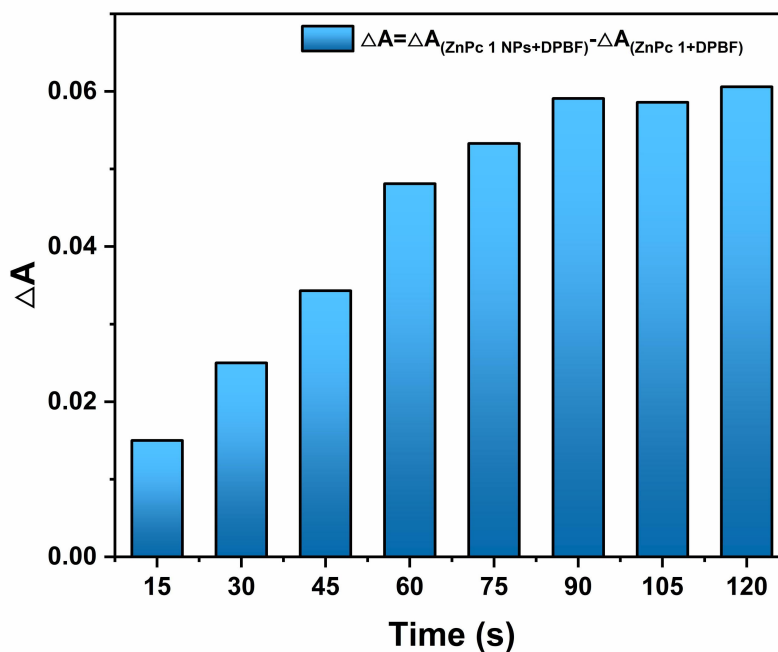

139  
140  
141  
142

**Figure S38.** The corresponding relative Increased absorbance variations of ZnPc 1 NPs at different irradiation times under the 690 nm laser irradiation (0.2 W/cm<sup>2</sup>).

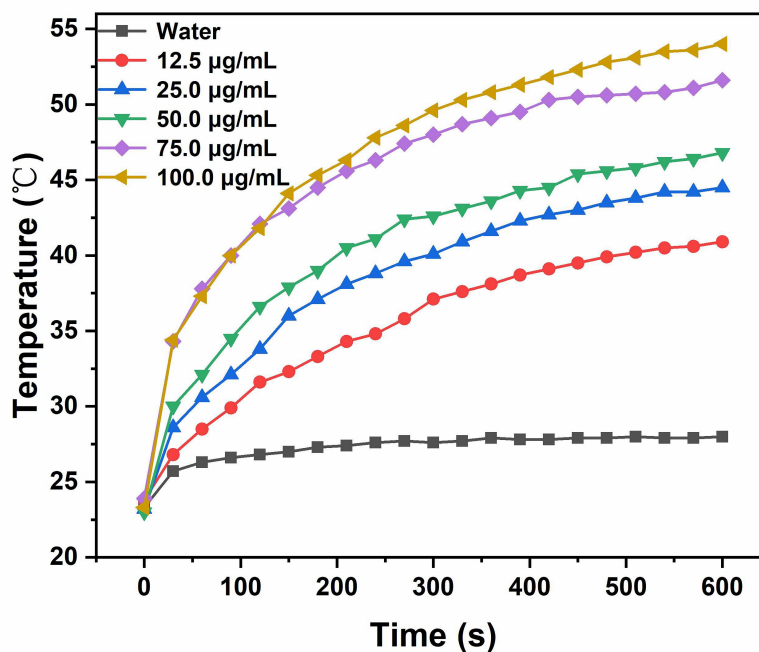

143

144  
145

**Figure S39.** Temperature elevation of ZnPc 1 NPs in dependence of concentration (808 nm, 1.0 W/cm<sup>2</sup>).

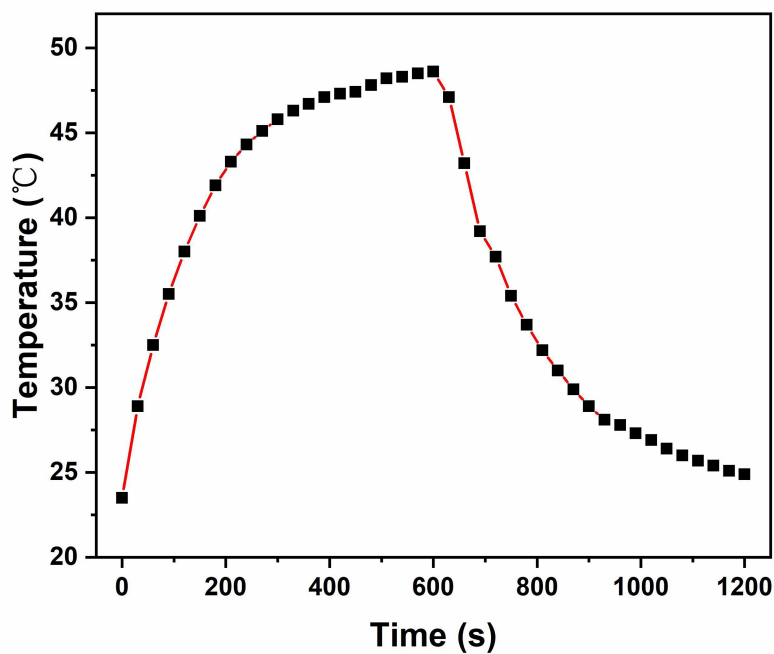

146  
147  
148

**Figure S40.** Photothermal effect of ZnPc 1 NPs irradiated with 808 nm laser (1.0 W/cm<sup>2</sup>).

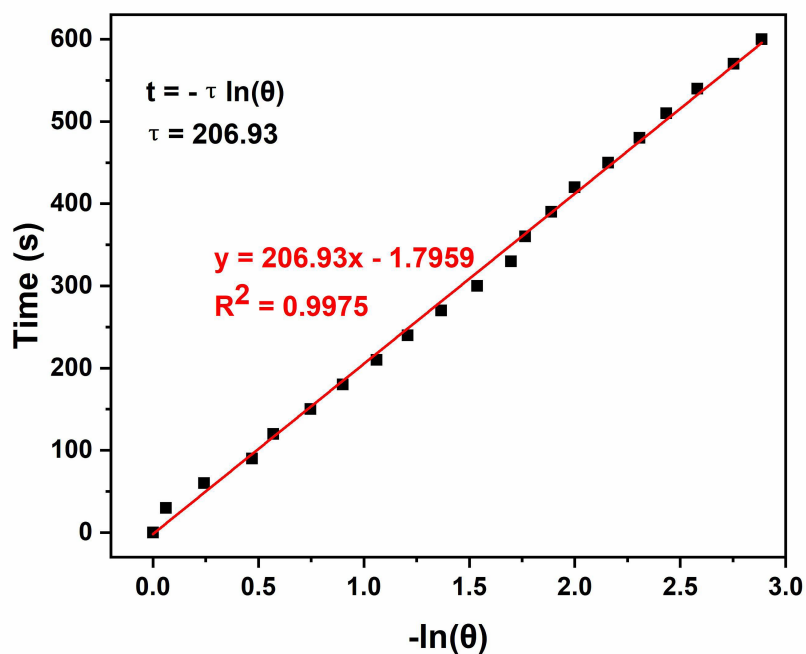

149  
150

**Figure S41.** Cooling time versus negative natural logarithm of the temperature obtained from the

151 cooling period.

152

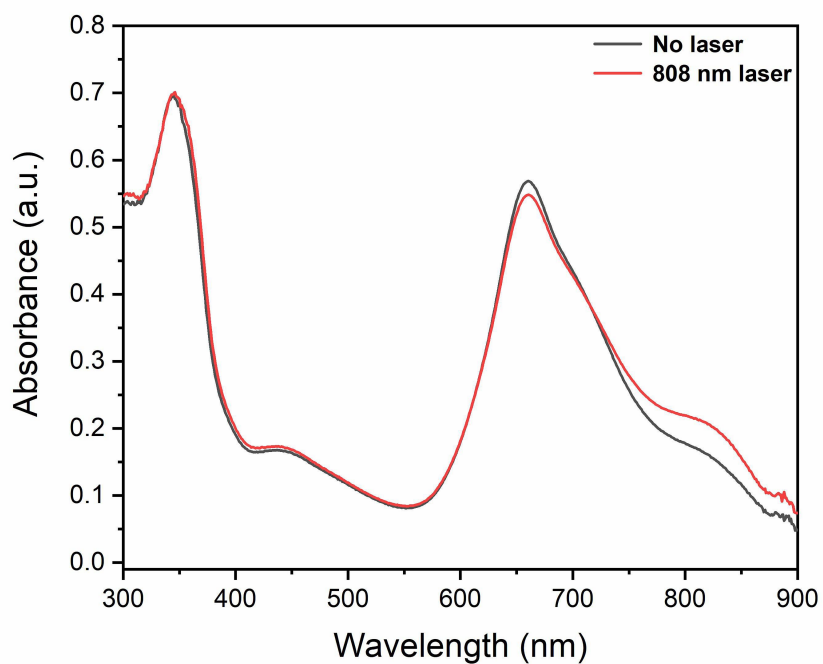

153

154 **Figure S42.** UV-Vis absorption spectra of ZnPc 1 NPs before and after 808 nm laser radiation (1.0  
155 W/cm<sup>2</sup>, 10 min).

156

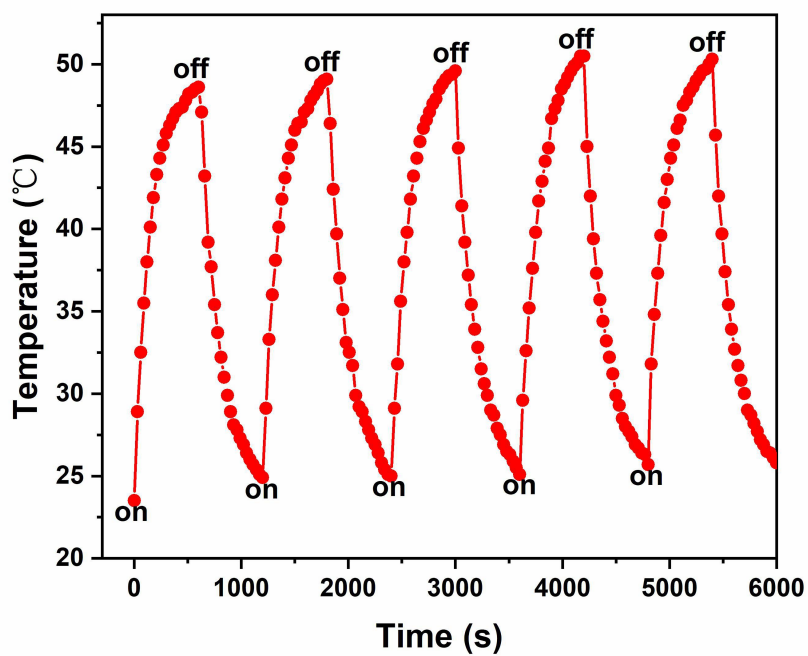

157

158

**Figure S43.** Temperature change of ZnPc 1 NPs for five irradiation/cooling cycles (1.0 W/cm<sup>2</sup>).

159

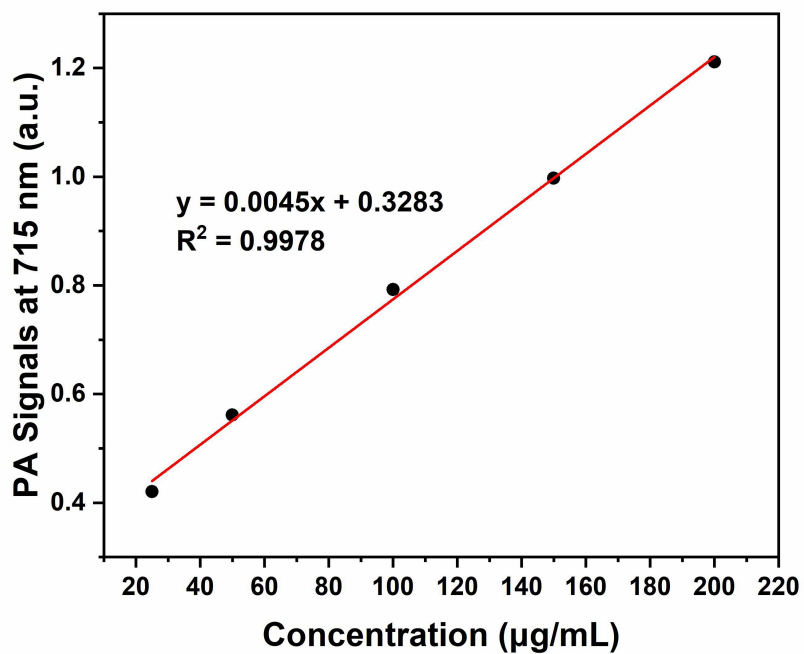

160

**Figure S44.** Temperature change of ZnPc 1 NPs for five irradiation/cooling cycles (1.0 W/cm<sup>2</sup>).

161

162

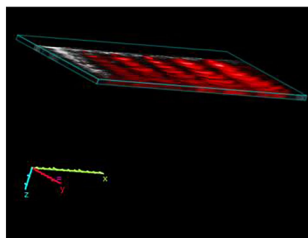

163

**Figure S45.** *In vitro* 3D-PA images (no render) of ZnPc 1 NPs upon excitation wavelength at 710 nm at corresponding concentrations.

164

165

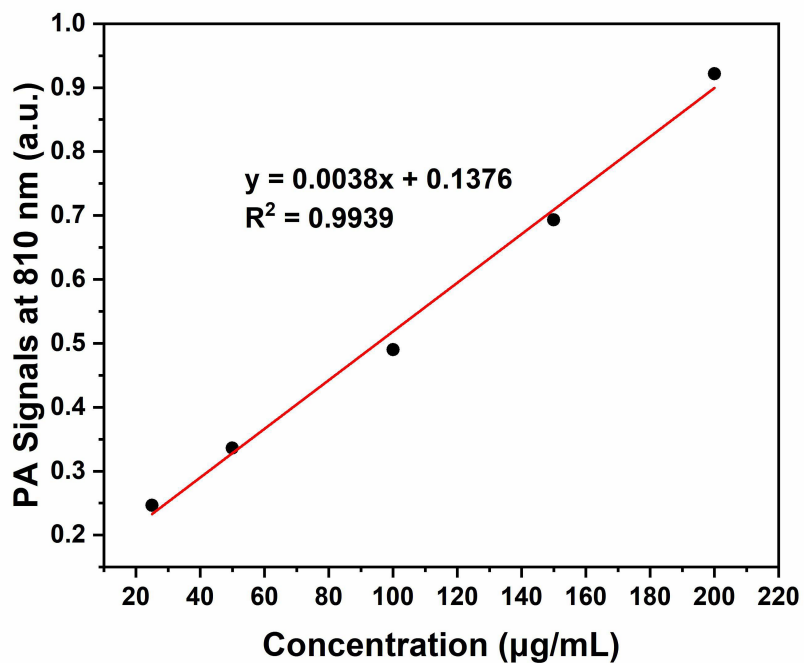

166

167 **Figure S46.** The liner plot of the PA signal of aqueous dispersions of ZnPc 1 NPs at 810 nm as a  
168 function of concentration.

169

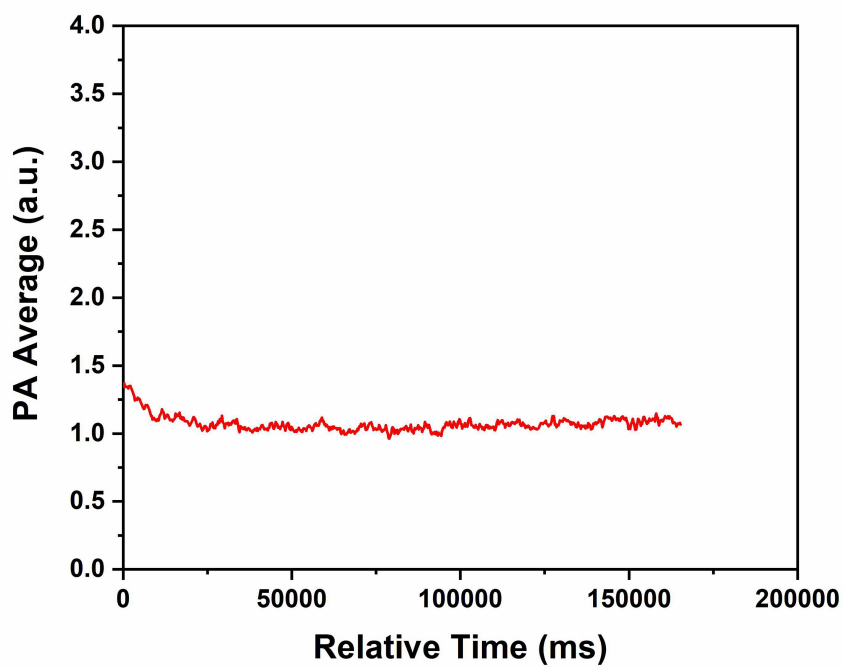

170

171 **Figure S47.** PA stability of ZnPc 1 NPs.

172



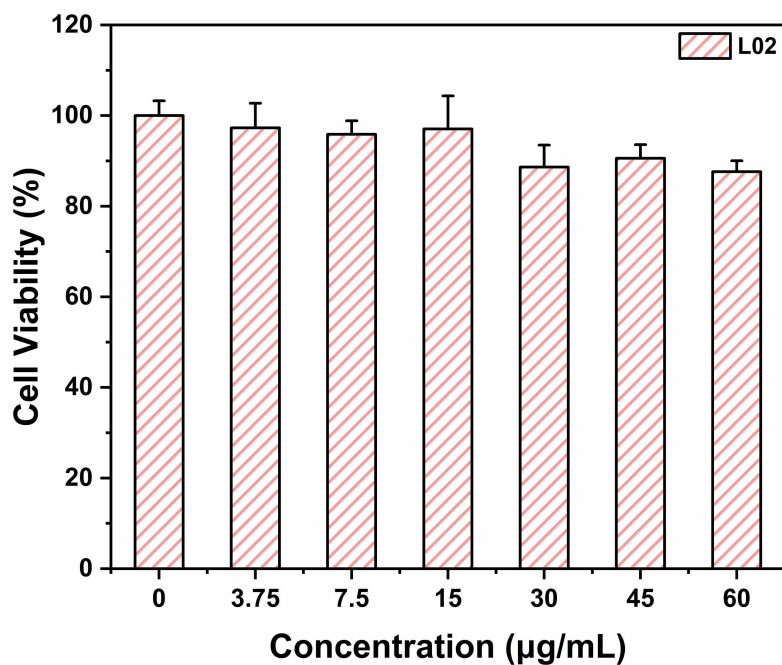

174

175 **Figure S48.** Viability of L02 cells treated with various concentrations of ZnPc 1 NPs in dark.  
 176 (n=3).

177

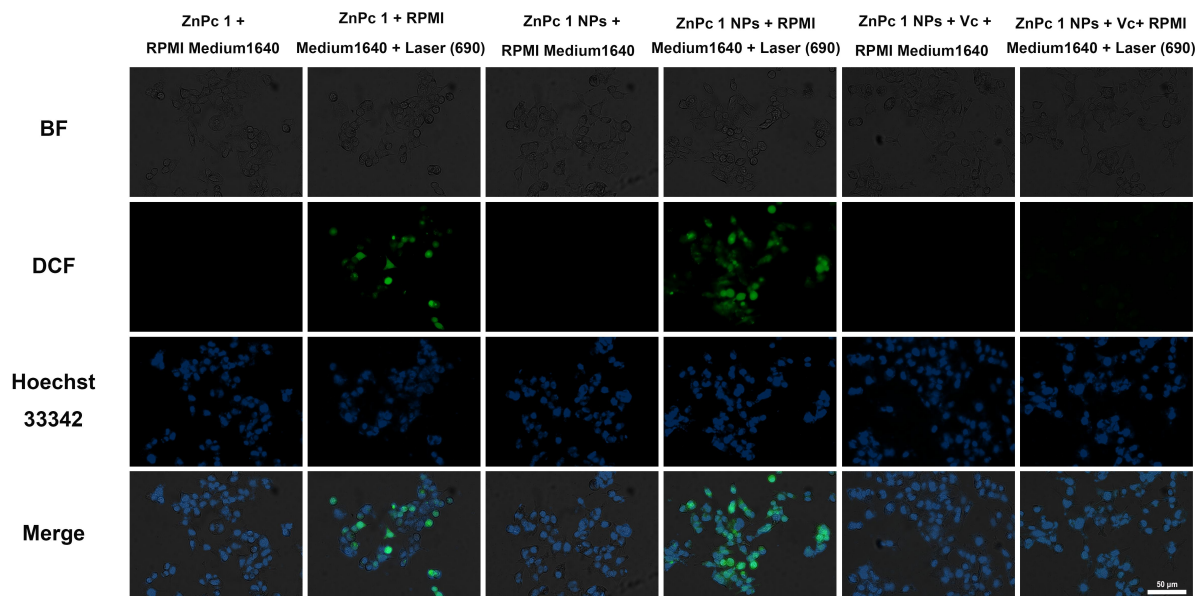

178

179

180 **Figure S49.** Intracellular generation of ROS in HepG2 cells after different treatments with CM-  
 181 H2DCFDA as a probe. (Scale bar represents 50 µm.)

182

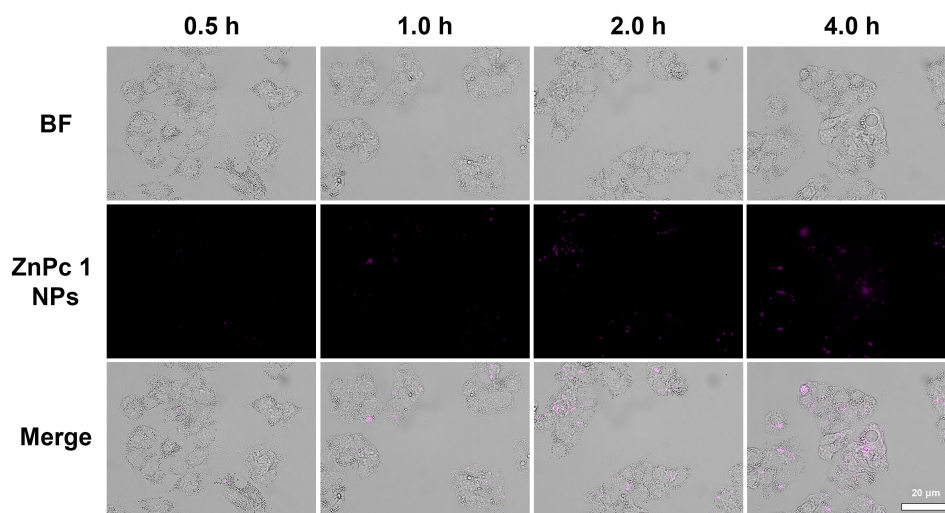

183

184 **Figure S50.** Cell uptake of ZnPc 1 NPs at different incubation times on HepG2.

185

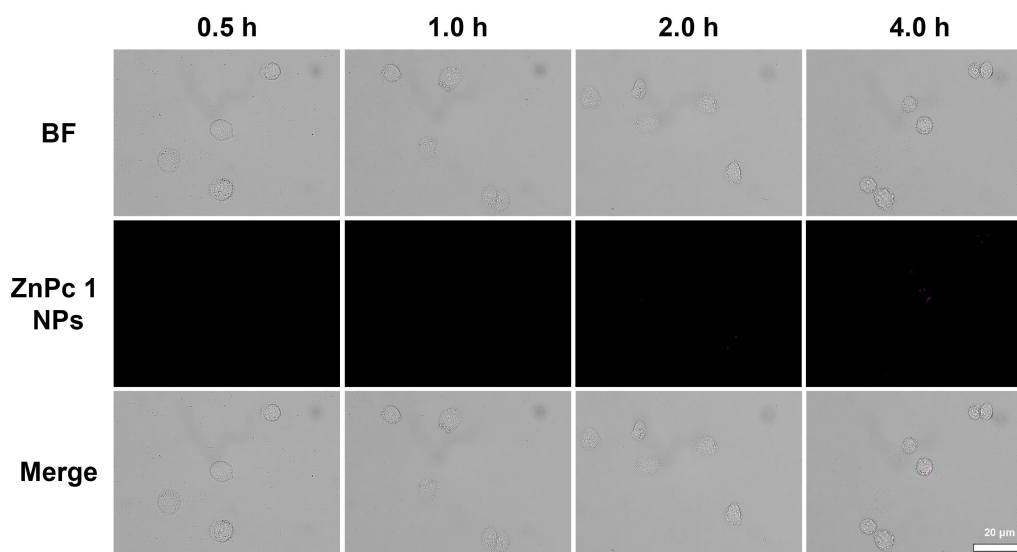

186

187 **Figure S51.** Cell uptake of ZnPc 1 NPs at different incubation times on L02.

188

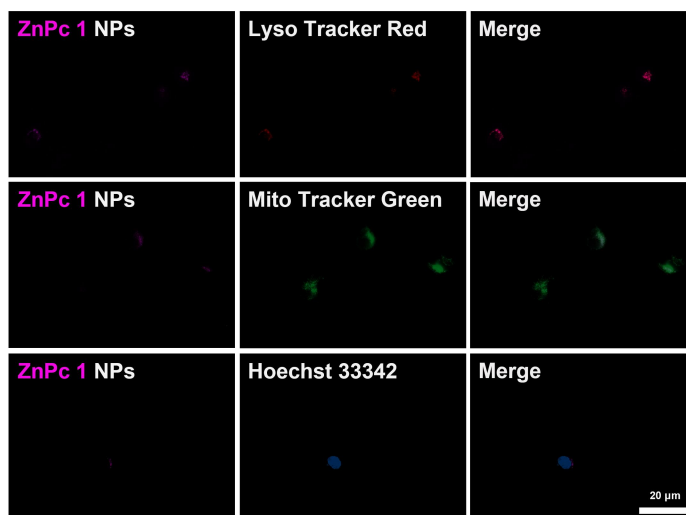

189  
190  
191  
192  
193

**Figure S52.** Confocal fluorescence images of L02 cells stained with LysoTracker Red, Mito Tracker Green and Hoechst 33342 following incubation with ZnPc 1 NPs for 4 h. (Scale bar represents 20  $\mu\text{m}$ .)

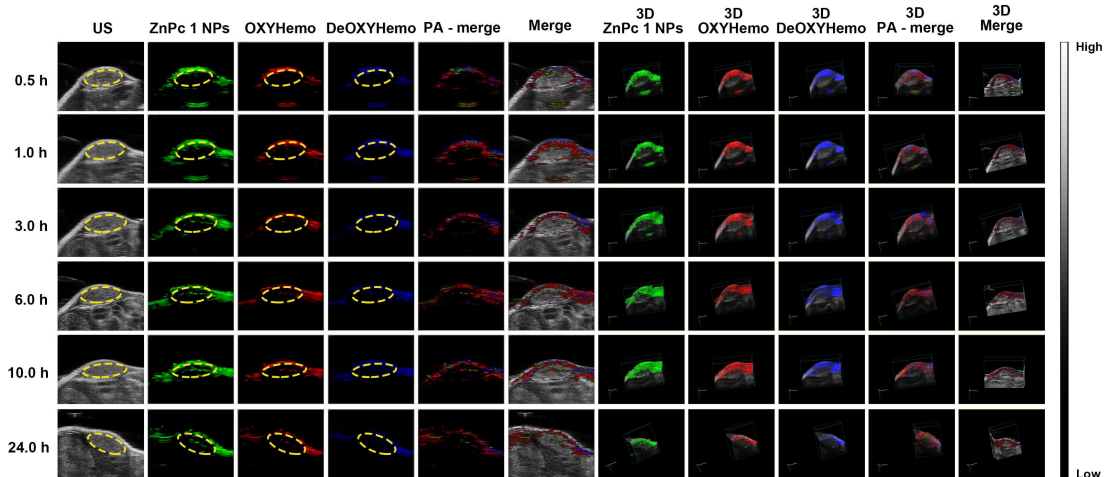

194  
195  
196  
197  
198

**Figure S53.** PA images of tumor site at different time points (0.5, 1, 3, 6, 24 h) after intravenous injection of ZnPc 1 NPs (100  $\mu\text{g}/\text{mL}$ , 100  $\mu\text{L}$ ). (These colored circles represent the location of the tumor.)

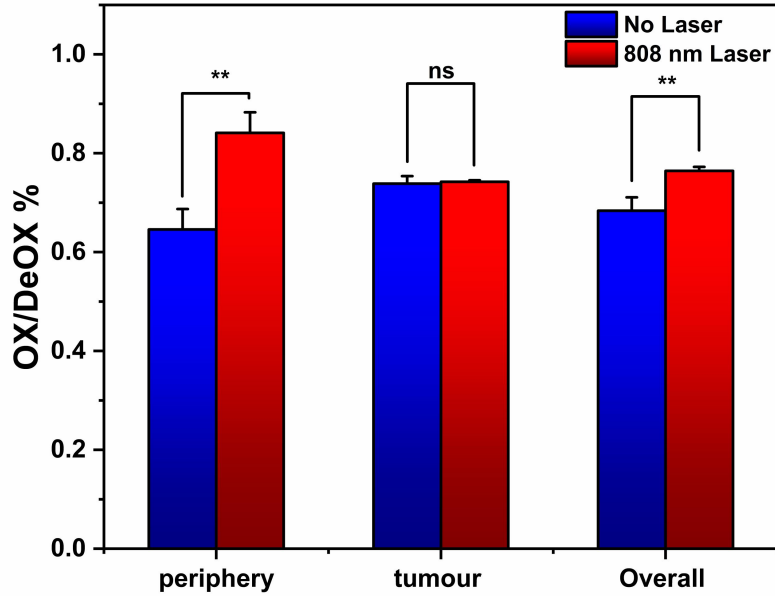

199

200 **Figure S54.** Comparison of oxygen signal/ hypoxia signal (OX/DeOX) in tumor, para-tumor site  
 201 and the overall at before and after 808 nm irradiation with PA mode. (The dual star indicators  
 202 indicate a significant statistical difference in OX/DeOX% before and after Laser (808) illumination,  
 203 whether in the eriphery or overall). Data are presented as mean  $\pm$  SD (n = 3; \*\*p < 0.01).  
 204 **Abbreviation:** ns, not significant.

205

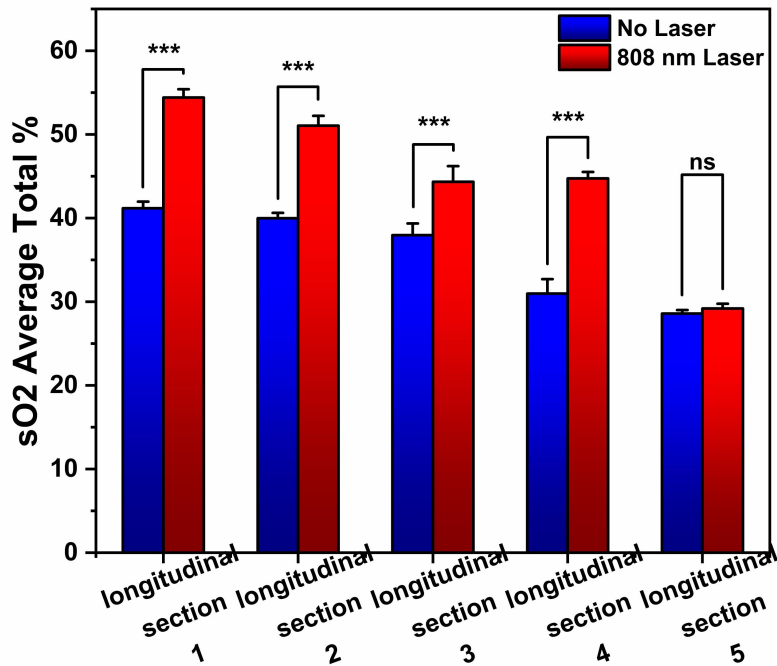

206

207 **Figure S55.** Comparison of the blood oxygen signal (sO<sub>2</sub> Average Total) of the scanning sections  
 208 at para-tumor site under before and after 808 nm irradiation with PA probe under OXYHemo mode.  
 209 (The triple asterisk indicators indicate an extremely significant statistical difference the blood  
 210 oxygen signal (sO<sub>2</sub> Average Total) of the scanning sections (from section 1 to section 4) at para-  
 211 tumor site under before and after 808 nm irradiation). Data are presented as mean  $\pm$  SD (n =  
 212 3;\*\*\*p < 0.001). **Abbreviation:** ns, not significant.  
 213

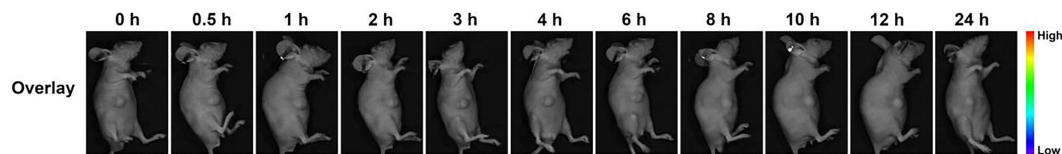

214  
 215 **Figure S56.** *In vivo* FL images of HepG2 tumor-bearing nude mice at different time points after  
 216 intravenous injection with PBS.

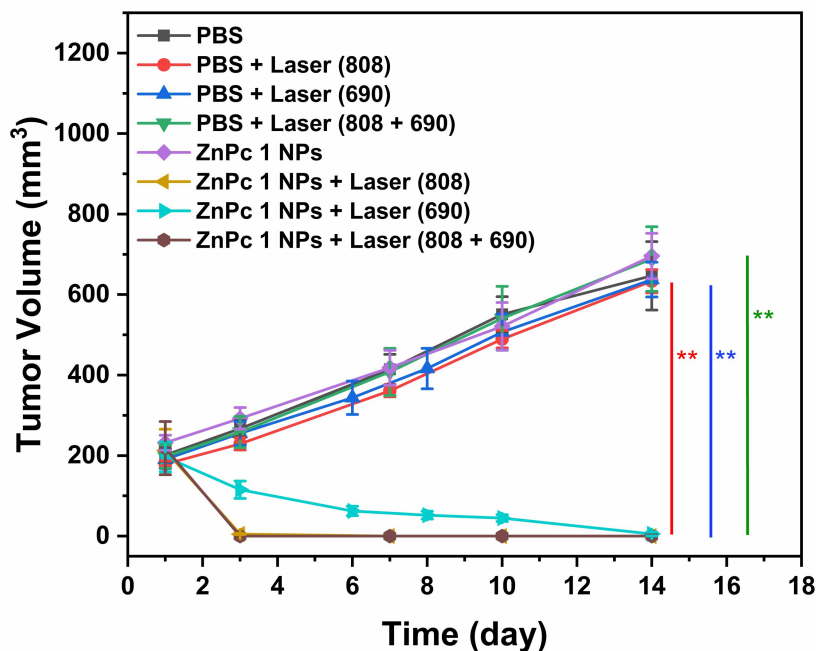

217  
 218 **Figure S57.** Tumor growth curve and of HepG2-tumor bearing mice after different treatments.  
 219 (The red asterisk indicators indicate a significant difference between the PBS+Laser (808) group  
 220 and the ZnPc 1 NPs+Laser (808) group; The blue asterisk indicators indicate a significant  
 221 difference between the PBS+Laser (690) group and the ZnPc 1 NPs+Laser (690) group; The green  
 222 asterisk indicators indicate a significant difference between the PBS+Laser (808+690) group and  
 223 the ZnPc 1 NPs+Laser (808+690) group.) Data are presented as mean  $\pm$  SD (n = 6; \*\*p < 0.01).

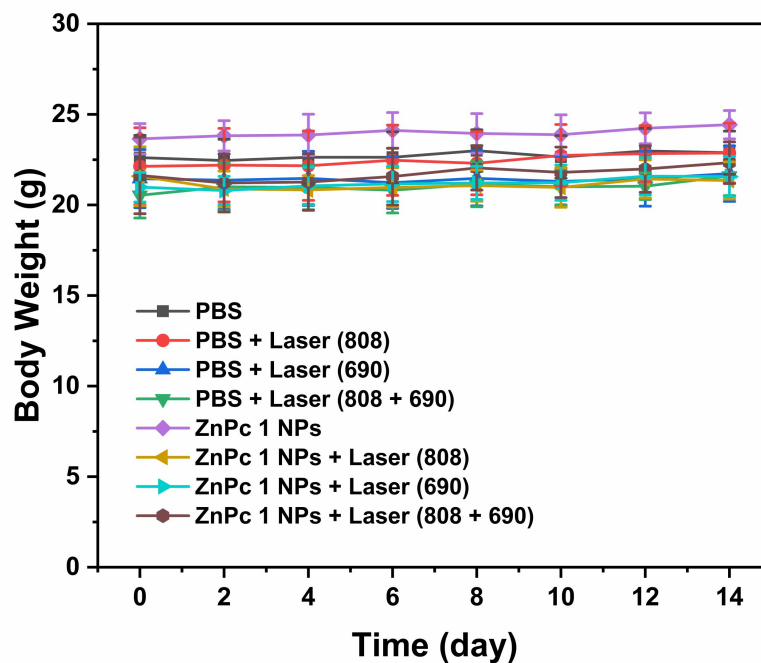

224

225

**Figure S58.** Body weight variation of HepG2-tumor bearing mice after different treatments.

226

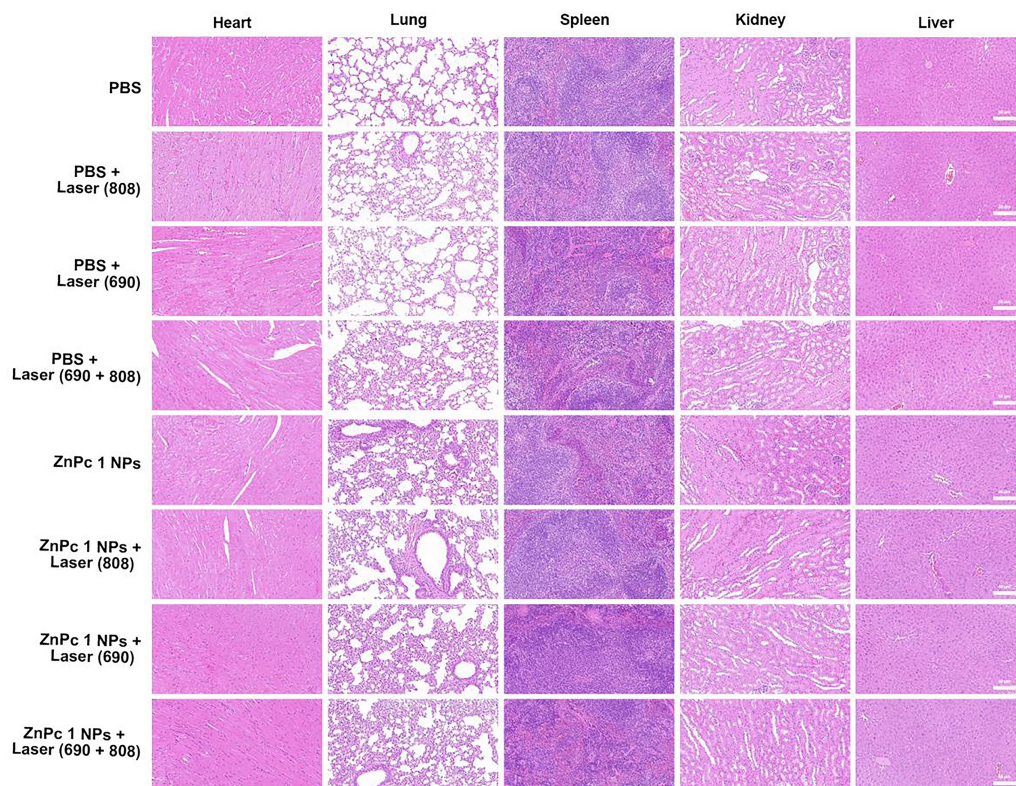

227

228

**Figure S59.** Histological observation of the organs from different treated groups of mice stained with H&E. (Scale bar represents 50  $\mu$ m.)

229

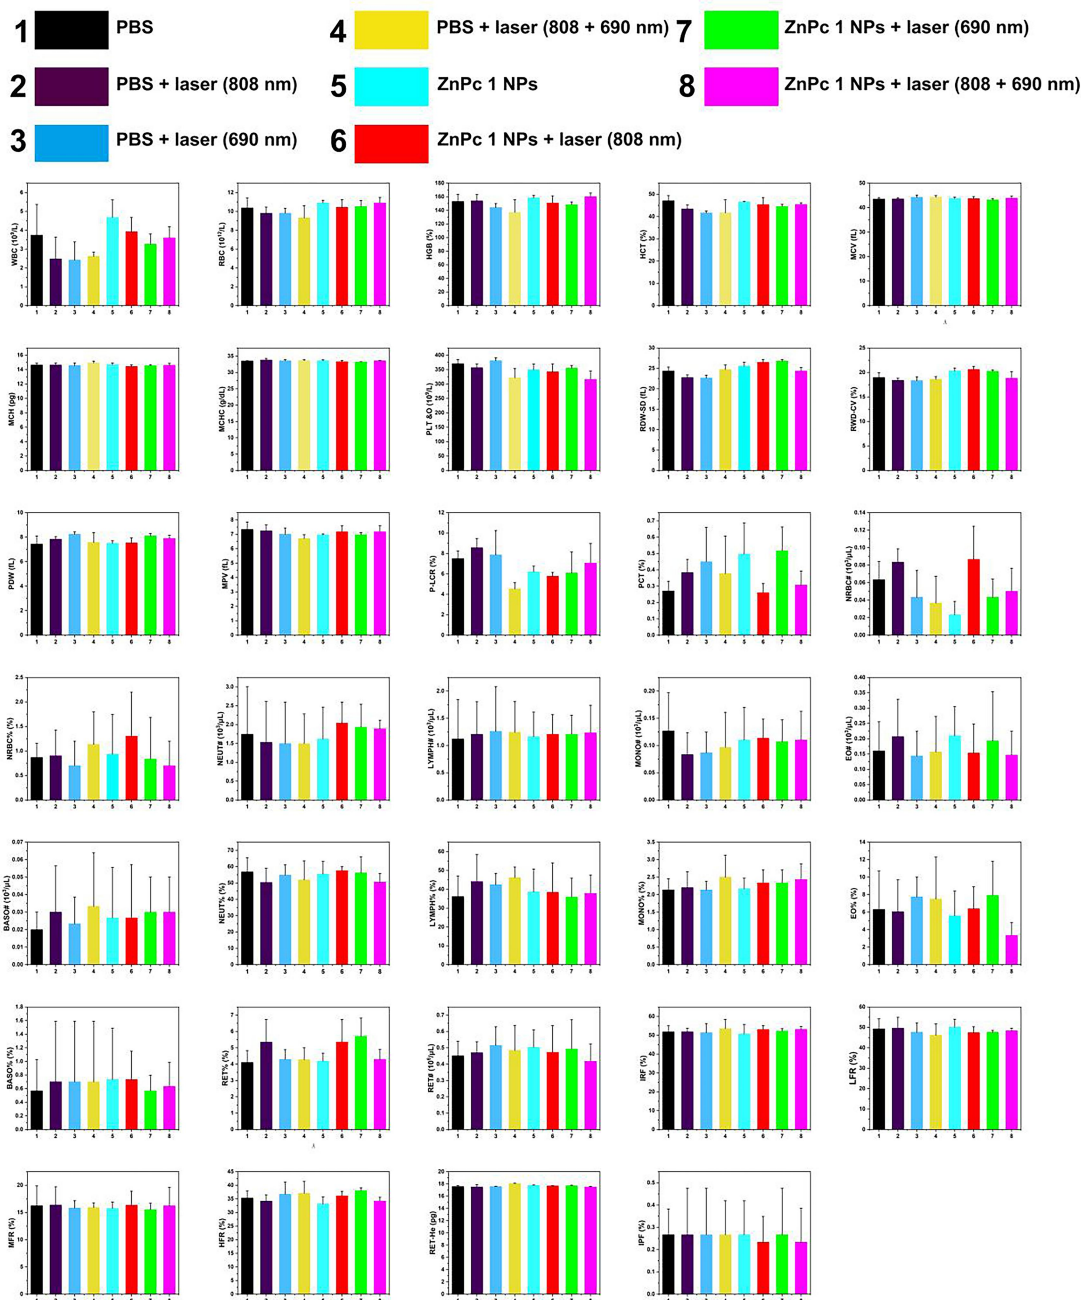

231

232

233

234

235

236

237

238

**Figure S60.** Blood routine examination of the mice with intravenous administration of ZnPc 1 NPs 14 days post-injection under various treatments. (Numbers from 1 to 8 correspond to eight groups of mice as follows: "PBS", "PBS + laser (808 nm)", "PBS + laser (690 nm)", "PBS + laser (808 + 690 nm)", "ZnPc 1 NPs", "ZnPc 1 NPs + laser (808 nm)", "ZnPc 1 NPs + laser (690 nm)" and "ZnPc 1 NPs + laser (808 + 690 nm)", which are marked in different colors, including black, dark-purple, light-blue, yellow, bright-blue, red, green, and pink-purple.)
